## **Calcium induced calcium release in proximity to hair cell BK channels revealed by PKA activation**

Jun-ping Bai<sup>a\*</sup>, Na Xue<sup>e\*</sup>, Omolara Lawal<sup>a</sup>, Anda Nyati<sup>f</sup>, Joseph Santos-Sacchi<sup>b,c,d</sup>, Dhasakumar Navaratnam<sup>a,b,d</sup>

Departments of Neurology<sup>a</sup>, Surgery<sup>b</sup>, Cell and Molecular Physiology<sup>c</sup>, and Neuroscience<sup>d</sup>, Yale School of Medicine, New Haven, CT, USA. Department of Otolaryngology-Head and Neck Surgery<sup>e</sup>, Shanghai Ninth People's Hospital, Shanghai Jiaotong University School of Medicine, Shanghai, China. Undergraduate Program<sup>f</sup>, Johns Hopkins University, Baltimore, MD, USA.

\*These authors contributed equally to this work.

Correspondence to: [Dhasakumar.Navaratnam@Yale.Edu](mailto:Dhasakumar.Navaratnam@Yale.Edu).

### **Abstract**

**Large conductance calcium-activated potassium (BK) channels play a critical role in electrical resonance, a mechanism of frequency selectivity in chicken hair cells. We determine that BK currents are dependent on inward flow of  $Ca^{2+}$ , and intracellular buffering of  $Ca^{2+}$ . Entry of  $Ca^{2+}$  is further amplified locally by  $Ca^{2+}$  induced  $Ca^{2+}$  release (CICR) in close proximity to plasma membrane BK channels. In artificial perilymph, we find peripheral clusters of high concentrations of  $Ca^{2+}$  that are suprathreshold to that needed to activate BK channels. PKA activation increases BK currents likely by recruiting more BK channels due to spatial spread of high  $Ca^{2+}$  concentrations in turn from increasing CICR. STORM imaging confirms the presence of nanodomains with ryanodine**

**and IP3 receptors in close proximity to the Slo subunit of BK channels. Together, these data require a rethinking of how electrical resonance is brought about and suggest effects of CICR in synaptic release. Both genders were included in this study.**

## **Introduction**

Large conductance potassium channels (BK) play an essential role in hair cell physiology. In mammalian inner hair cells, these channels are the largest contributor to its outward current. In mammalian outer hair cells, these channels lie in proximity to nicotinic receptors and serve to set the resting membrane potential. In non-mammalian vertebrates, BK channels play an essential role in electrical resonance, a mechanism of frequency selectivity (Fuchs and Evans, 1990; Art et al., 1995; Fettiplace and Fuchs, 1999; Duncan and Fuchs, 2003).

In the best-studied example of turtles, electrical resonance is brought about by an interplay of an inward current through voltage-gated  $\text{Ca}^{2+}$  channels, and an outward current from large-conductance  $\text{Ca}^{2+}$  activated potassium (BK) channels (Fettiplace and Fuchs, 1999). These two channels lie in close proximity to one another and bring about oscillation in membrane potential (Roberts et al., 1990; Fettiplace and Fuchs, 1999). The frequency of membrane potential oscillation varies as a function of tonotopicity (Crawford and Fettiplace, 1981). In the turtle, this change in frequency is in turn brought about by variation in the number of channels and, more importantly, a change in the kinetics of the BK channel (Fettiplace and Fuchs, 1999). These data have been mainly corroborated in the chick auditory epithelium (Fettiplace and Fuchs, 1999; Duncan and Fuchs, 2003).

How might the changes in BK channel kinetics be brought about? The early promise of varying primary structure of the alpha subunit of the BK channel from changing alternative splicing along the tonotopic axis failed to explain the variation in channel kinetics (Jones et al., 1999; Ramanathan et al., 1999; Miranda-Rottmann et al., 2010). Changes in association with auxiliary proteins and changes in kinase activity along the tonotopic axis are two other mechanisms that could account for the alterations in the kinetic properties of the BK channel. Prior data have shown expression of KCNMB1 and KCNMB4 in the low-frequency end of the basilar papilla (Ramanathan et al., 2000; Bai et al., 2011), and, indeed, we demonstrated changes in CDK5 expression along the tonotopic axis (Bai et al., 2012b). Furthermore, higher PKA expression at the low-frequency end of the tonotopic axis is suggested by global gene expression analysis along the tonotopic axis (Frucht et al., 2011).

In this paper, we sought to determine how PKA activity affects BK channel kinetics in tall hair cells that receive principally afferent innervation. Our unexpected finding was that PKA recruited BK channels by inducing calcium-induced calcium release (CICR). Using super-resolution microscopy, we determine expression of clusters of both IP3 and ryanodine receptors along the plasma membrane of these cells in proximity to Slo, the alpha subunit of BK channels. These data have implications for the speed and amplification of feedback loops governing electrical tuning, and for synaptic vesicle release.

## **Methods**

All of the studies were done in accordance with the National Institutes of Health Guide for the Care and Use of Laboratory Animals, and the protocols were applied in compliance with the Yale University institutional review board guidelines.

### Electrophysiological recording.

Whole-cell patch-clamp recordings were made of tall hair cells from freshly isolated basilar papilla from E21 chicks of either sex, when hearing is mature (Saunders et al., 1973; Fuchs and Sokolowski, 1990; Jones and Jones, 1995). Hair cells were exposed as previously described (Ricci et al., 2013). Recordings were obtained in the whole-cell configuration. Hair bundle heights were measured as a reference to its tonotopic location (Tilney et al., 1986). Cells were recorded in the presence of blockers of KCNQ (100  $\mu$ M linopirdine) and SK channels (300 nM apamin), to isolate BK currents. The extracellular solution was as follows (in mM): 144 NaCl, 0.9 MgCl<sub>2</sub>, 1.3 CaCl<sub>2</sub>, 0.7 NaH<sub>2</sub>PO<sub>4</sub>, 10 HEPES, and 5 glucose, pH 7.4 and 300 mOsm. The composition of the pipette solution was (in mM): 120 K-gluconate, 20 KCl, 5 EGTA, 5 HEPES, 2.5 Na<sub>2</sub>ATP, 3.5 MgCl<sub>2</sub>, and 10 Na-phosphocreatine, pH 7.2 and 300 mOsm, and CaCl<sub>2</sub> was added to reach the appropriate free Ca<sup>2+</sup> concentration. The amount of total CaCl<sub>2</sub> needed to obtain the desired free Ca<sup>2+</sup> concentration was calculated with Max Chelator (<https://somapp.ucdmc.ucdavis.edu/pharmacology/bers/maxchelator/webmaxc/webmaxcE.htm>). Final free Ca<sup>2+</sup> concentration was measured with a Ca<sup>2+</sup> electrode (Thermo Electron, Beverly, MA) and confirmed our calculations. The extracellular solutions were delivered with the ALA QMM micromanifold perfusion system (ALA Scientific Instrument, Westbury, NY). Recordings were made at room temperature with an Axon 200B amplifier (Axon Instruments, Sunnyvale, CA). Command delivery and data collections were carried out with a Windows-based whole-cell voltage-clamp program, jClamp (Scisoft, Ridgefield, CT), using a Digidata 1322A interface (Axon Instruments). A standard protocol was adopted consisting of stepping the membrane potential from a holding potential of -80 mV to membrane potential 80 mV at 20-mV increments for 100 ms. Currents were digitized at 100 kHz and filtered at 5–10 kHz. Pipette resistance was

~3-5 M $\Omega$ . Current-voltage (I-V) curves were obtained by measuring the averaged amplitude of currents at steady state after depolarization to various test voltages from holding the cells at -80 mV. Seal resistances for the recordings ranged from 0.5-2 G $\Omega$ , (mean 1 +/- 0.06 G $\Omega$ , median 0.8 G $\Omega$ ). Offline correction for voltage errors due to the uncompensated series resistance was done. Similarly, leak currents were subtracted by estimating linear currents extrapolated from slopes at -95 to -80mV where currents were linear. We corrected for junctional potentials owing to differences in Cl<sup>-</sup> concentrations in the pipette and bath solutions. Data are reported as mean  $\pm$  SE.

#### Calcium imaging with confocal microscopy.

Imaging was performed of chick hair cells from freshly isolated basilar papilla from E21 chicks. Chick hair cells were incubated with 1  $\mu$ M Fluo-3-AM for 30 minutes at 22-24<sup>0</sup> C. Stock solutions of 1 mM Fluo-3-AM in DMSO were diluted to 1  $\mu$ M in aqueous solution. Typically, cells were incubated in the presence of artificial perilymph (in mM: 144 NaCl, 0.9 MgCl<sub>2</sub>, 1.3 CaCl<sub>2</sub>, 0.7 NaH<sub>2</sub>PO<sub>4</sub>, 10 HEPES, and 5 glucose, pH 7.4 and 300 mOsm). Perilymph containing 1  $\mu$ M Fluo-3-AM was substituted with perilymph at the time of fluorescence measurement. In experiments with nominally 0  $\mu$ M Ca<sup>2+</sup>, CaCl<sub>2</sub> was removed and 2 mM EGTA added with the remaining constituents of the perilymph solution remaining constant. The papilla was mounted on a glass microtek dish under two insect pins, and Ca<sup>2+</sup> signal was visualized while exciting at 488 nm using a Zeiss inverted spinning disc confocal microscope (Zeiss Observer Z1) with a 40X objective using 0.4  $\mu$ m optical sections. For control experiments hair cells were incubated with medium containing specific concentrations of Ca<sup>2+</sup> in the presence of the Ca<sup>2+</sup> ionophore A23187 (1  $\mu$ m) and 1  $\mu$ M Fluo-3-AM for 30 minutes at 22-24<sup>0</sup>C (Dedkova et al., 2000). Where

we measured effects of drugs in a time dependent manner, fluorescence from the same cells were tracked with the focal plane unchanged. Drift correction was applied to compensate for specimen drift. Image data were quantified with background correction using Zeiss Zen and Fiji software.

#### Stochastic optical reconstruction microscopy (STORM) microscopy.

Chick basilar papilla was labeled following protocol for super-resolution microscopy. In brief, freshly isolated basilar papillae were isolated and hair cells exposed by removal of the tectorial membrane following treatment with 0.5% collagenase for 4-5 minutes. Tissue was pre-extracted with 0.2% saponin followed by a fixation with 3% PFA and 0.1% glutaraldehyde. The tissue was reduced with 0.1% NaBH and labeled with primary (1:50) and secondary antibody (1:400, donkey antimouse Alexa 647 and donkey antirabbit Alexa 561) after blocking, with three washes of 3 minutes each between each step. The sample was post-fixed after antibody labeling with 4% PFA for 5 minutes. Freshly made imaging buffer containing glucose oxidase, catalase, mercaptoethanol, and MEA was added just before imaging. Super-resolution STORM images were obtained with the Bruker Vutara SR352 (Bruker Nano Surfaces, Salt Lake City, UT) with a 60x 1.2 NA objective and a 1 W 561 nm and 640 nm laser. Imaging beads confirmed that resolution was 20 nm in the  $xy$  plane and 50 nm in the  $z$ -direction. Calibration before experimentation was done by calculating the point spread function (PSF) in three dimensions using beads. Images were rendered and analyzed with Vutara's SRX localization and visualization software (v6.2). Images were obtained in both planes simultaneously. The background was removed after the frames were obtained and particles identified on their brightness. Three-dimensional localization of the particles was based on 3D model function that was obtained from recorded bead datasets. The recorded fields are aligned automatically by

computing the affine transformation between the pair of planes. Typically, we collected 5000 frames with each fluorophore using 20  $\mu$ sec times. Data were analyzed using algorithms embedded in the Vutura software. These include the Crossed Nearest Neighbor algorithm and cluster identification. All chemicals were purchased from Sigma-Aldrich. Primary antibodies were as follows: mouse IgG2a monoclonal anti-BK channel  $\alpha$  subunit antibody (BD Labs) (Surguchev et al., 2012), anti-BK channel  $\alpha$  subunit polyclonal antibody (APC021) (Alomone labs, Jerusalem, Israel) (Purcell et al., 2011) ; IgG1 monoclonal anti-ryanodine receptor antibody (clone 34C, Developmental Studies Hybridoma Bank, University of Iowa, Iowa City, Iowa; this antibody detects all RyR isoforms in mouse tissue (Irie and Trussell, 2017); rabbit polyclonal anti IP3R2 antibody (Alomone labs, Jerusalem, Israel(Tadevosyan et al., 2017; Sabourin et al., 2018). Secondary antibodies were as follows: AF 568 goat anti-mouse IgG, AF 568 goat anti-rabbit IgG, Alexa Fluor 647 goat anti-rabbit IgG, and Alexa Fluor 647 goat anti-mouse IgG (Jackson labs, Maine). We used mouse monoclonal Slo antibody with the polyclonal rabbit IP3 antibody (and corresponding conjugated secondary antibodies) to detect co-localization of these two proteins. For experiments to detect ryanodine receptor and Slo protein we used the Slo polyclonal rabbit antibody and ryanodine monoclonal mouse antibody together with the corresponding secondary antibodies. All primary antibodies were used at a concentration of 1 $\mu$ g/ ml. All secondary antibodies were used at a 1:200 dilution. These antibodies have all been previously validated.

## **Results**

**Hair cells possess a BK current that is sensitive to entry of extracellular  $\text{Ca}^{2+}$ , and intracellular  $\text{Ca}^{2+}$  buffering.**

Current recordings of chick hair cells from the neural edge, 20-25% of the distance of the basilar papilla from the apical end, were obtained under whole-cell voltage-clamp conditions. We confirmed the location of these hair cells using stereociliary height (Tilney et al., 1986). As previously demonstrated (Fuchs et al., 1988; Fuchs and Evans, 1990) (Fuchs and Sokolowski, 1990), these cells demonstrated a large outward current with 140mM KCl in the pipette and 140mM Na Cl in the bath (Figure 1A). Consistent with previous experimental data, the majority of the current was carried by a large-conductance Ca<sup>2+</sup> activated K channel (Fuchs et al., 1988; Fuchs and Evans, 1990; Fuchs and Sokolowski, 1990; Duncan and Fuchs, 2003). The outward current showed rapid rates of activation that is a hallmark of BK currents. Thus, activation times when stepping from -95mV to +50mV were 1.74 +/- 0.12 ms (N=29) with 0 μM pipette Ca<sup>2+</sup> (using EGTA as a buffer), 1.67 +/- 0.18 ms (N=11) with 10 μM pipette Ca<sup>2+</sup>, and 1.62 +/- 0.11 ms (N=60) with 100 μM pipette Ca<sup>2+</sup>. Consistent with it being a BK current, it was blocked by extracellular TEA (20mM), partially blocked by 100 μM Penitrem A, an incomplete blocker of BK channels, and insensitive to 5mM 4-AP, a blocker of voltage-gated potassium channels (**Figure 1A-I**). The bath also contained 100 μM linopirdine, 300 nM apamin and 50 μM PPADS, blockers of KCNQ and SK channels and P2 purinergic receptors respectively, the other sources of outward currents in these cells. As previously reported, these BK current are insensitive to charybdotoxin and iberiotoxin owing to the high expression of the beta4 (KCNMB4) subunit that confers resistance to these blockers (Reinhart et al., 1989; Brenner et al., 2000; Meera et al., 2000; Brenner et al., 2005; Gan et al., 2008; Bai et al., 2012a).

The size of the outward current and its voltage sensitivity was dependent on the inward flow of Ca<sup>2+</sup>. The size of the current decreased and showed a rightward shift in its voltage-current



relationship when voltage-gated  $\text{Ca}^{2+}$  channels were blocked with 100  $\mu\text{M}$   $\text{CdCl}_2$  (**Figure 2A-E**).  $V_{1/2}$  was shifted from -10 mV to 21mV after perfusion with  $\text{CdCl}_2$ . There was a similar shift in  $V_{1/2}$  from -15mV to 30mV and a reduction in the size of the current (**Figure 2 F-J**) when extracellular  $\text{Ca}^{2+}$  was chelated (with 3 mM EGTA).

The size and voltage dependence of the current is dependent on the intracellular  $\text{Ca}^{2+}$  buffer (**Figure 2 K-O**). The voltage dependence was significantly shifted in a depolarizing direction when using BAPTA as the intracellular buffer (with nominally 0  $\mu\text{M}$   $\text{Ca}^{2+}$ ) compared to using EGTA as the intracellular buffer (again, with nominally 0  $\mu\text{M}$   $\text{Ca}^{2+}$ ).  $V_{1/2}$  was shifted from -6 mV to 30 mV with EGTA and BAPTA as the intracellular buffers, respectively. The size of the outward current was also significantly reduced when BAPTA (nominally 0  $\mu\text{M}$   $\text{Ca}^{2+}$ ) was used as the intracellular buffer when compared to using intracellular EGTA (nominally 0  $\mu\text{M}$   $\text{Ca}^{2+}$ ). These data argue that spatial buffering by BAPTA significantly attenuates influx of  $\text{Ca}^{2+}$  in proximity to BK channels. It has been estimated that buffering by BAPTA limits the spread of  $\text{Ca}^{2+}$  to 20-50 nm (nanodomains). In contrast, owing to the slower on rate of EGTA spatial buffering is limited to micro-domains (> 50nm).

Increasing intracellular  $\text{Ca}^{2+}$  in the presence of EGTA from 0 to 10  $\mu\text{M}$  resulted in an increase in the size of the current (**Figure 2 K-O**). The size of the current was further increased in the presence of 100  $\mu\text{M}$   $\text{Ca}^{2+}$ . However, these increases in the size of the current were accompanied by a minimal shift in voltage sensitivity (**Figure 2 K-O**). Along with the data from recordings in the presence of BAPTA, these data argue that the local concentration of  $\text{Ca}^{2+}$  in proximity to BK channels from inward flow of  $\text{Ca}^{2+}$  is spatially buffered by BAPTA. They also argue that the

local concentration of  $\text{Ca}^{2+}$  around BK channels is saturating in the presence of EGTA with nominally 0  $\mu\text{M}$  and higher  $\text{Ca}^{2+}$  (when spatial buffering is more limited). Finally, these data suggest that spatial buffering of intracellular  $\text{Ca}^{2+}$  is a possible mechanism of recruiting BK channels.

### **Perfusion with activators of PKA increased the size of the outward current**

Perfusing cells with 100  $\mu\text{M}$  forskolin increased the size of the outward current by twofold (**Figure 3A-C**), an effect similar to increasing intracellular (pipette)  $\text{Ca}^{2+}$  (Figure 2). The effect of forskolin was dependent on the concentration of intracellular  $\text{Ca}^{2+}$ . Thus, the forskolin-induced increase in outward current was evident with 100  $\mu\text{M}$  intracellular (pipette)  $\text{Ca}^{2+}$  (**Figure 3A-E**). In contrast, there was a no increase in the size of the current in the presence of nominally 0  $\mu\text{M}$  intracellular (pipette)  $\text{Ca}^{2+}$  (**Figure 3F-J**). The effects of forskolin in the presence of 10  $\mu\text{M}$   $\text{Ca}^{2+}$  was intermediate (data not shown). Suggesting the presence of a saturating  $\text{Ca}^{2+}$  concentration at baseline before perfusion with forskolin,  $V_{1/2}$  was minimally affected, shifting a non-significant -14 mV to -7mV with forskolin (with 100  $\mu\text{M}$  pipette  $\text{Ca}^{2+}$ ). Confirming a basal activation of PKA in hair cells contributing to BK channel activity, with 100  $\mu\text{M}$   $\text{Ca}^{2+}$  in the pipette, perfusion of the PKA inhibitor H-89 reduced the size of the outward current by approximately 1/3 (**Figure 3K-O**). This reduction in the size of the current was not accompanied by a change in the voltage-current relationship (**Figure 3K-O**).  $V_{1/2}$  was shifted by a non-significant -12 mV to -5 mV after perfusion with H-89. Together, these data suggest that PKA increases BK channel activity that is dependent on intracellular  $\text{Ca}^{2+}$  concentration and that hair cells have a basal level of PKA activity.

### **The effects of forskolin on the outward current are due to Ca<sup>2+</sup>-induced Ca<sup>2+</sup> release.**

How does PKA increase BK channel activity while minimally affecting  $V_{1/2}$ ? Direct effects on the channel bearing the STREX exon (the dominant exon in these hair cells) would be predicted to shift  $V_{1/2}$  in a depolarizing direction (Tian et al., 2001; Frucht et al., 2011). Since forskolin effects on hair cell outward current were dependent on pipette Ca<sup>2+</sup> concentration, Ca<sup>2+</sup>-induced Ca<sup>2+</sup> release was suggested as a likely mechanism. To test this possibility, we treated cells with an inhibitor of ryanodine receptors. Currents from hair cells under voltage clamp were recorded in the presence of 100  $\mu$ M pipette Ca<sup>2+</sup> and treated with 10  $\mu$ M dantrolene, a potent blocker of ryanodine receptors (**Figure 4F-J**). There was a significant reduction in the size of the current. The reduction in the size of the current was also not accompanied by a change in its voltage dependence.  $V_{1/2}$  shifted from -5 mV to -3 mV. Separately, cells treated with 10  $\mu$ M dantrolene and 100  $\mu$ M forskolin showed a similar reduction in the size of the outward current (**Figure 4A-E**). There was a tendency for decreased voltage sensitivity that was however, not statistically significant.  $V_{1/2}$  shifted from -9 mV to 0 mV after treatment.

We also tested the ability of inhibitors of IP3 receptors (ITPRs) to block the effects of forskolin. Similar to dantrolene, cells treated with IP3 receptor antagonists (100  $\mu$ M 2-APB - (2-aminoethoxydiphenyl borate), resulted in a similar reduction in the size of the outward current (**Figure 5F-H**). The voltage sensitivity shifted in a depolarizing direction with  $V_{1/2}$  shifting from -11 mV to -1 mV. As with dantrolene and forskolin, hair cells separately treated with 100  $\mu$ M 2-APB and 100  $\mu$ M forskolin showed a decrease in the size of the outward current (**Figure 5A-E**). Unlike dantrolene however, there was a greater reduction in the size of the current when 2-APB was combined with forskolin (when compared to 2-APB alone). Currents were 40% of

preperfusion values, in contrast to the effects of 2APB alone where currents were 60% of preperfusion values. Moreover, there was a hyperpolarizing shift in the  $V_{1/2}$  from -7 mV to 9 mV (**Figure 5E**). We believe these effects on the size of the current and its I-V relationship to represent two causes; a reduction in local  $\text{Ca}^{2+}$  concentrations by preventing CICR, and a directly inhibitory effect of PKA on the Slo channel containing the STREX exon in the absence of local release of  $\text{Ca}^{2+}$  (Ramanathan et al., 2000; Chen et al., 2005; Frucht et al., 2011). Although these experiments were not specifically designed to address the concern of effects at a hair cells operating voltage, we noted that IP3 receptor blocking had a significant effect on the size of the outward current at a hair cells operating voltage, estimated to be -50 mV, in contrast to block of ryanodine receptors.

Together, these data confirm that PKA increases hair cell  $\text{Ca}^{2+}$  concentration in proximity to BK channels by a calcium-induced calcium release (CICR) mechanism, with inhibition of IP3 receptors having a bigger effect.

### **$\text{Ca}^{2+}$ imaging reveals clusters of $\text{Ca}^{2+}$ signal in the periphery of hair cells that is dependent on CICR**

To confirm  $\text{Ca}^{2+}$  influx and its effects, we imaged hair cells loaded with the  $\text{Ca}^{2+}$  sensor dye Fluor-3-AM. We noted a significant increase in the Fluor-3 signal when the cells were incubated with perilymph that contains 1.3 mM  $\text{Ca}^{2+}$ . The signal was most notable along the periphery of the cell in axial sections when the cell was viewed end-on from above (**Figure 6A**). In cells viewed laterally, there was a significant increase in signal at the periphery of that was weighted

to the lower half of the cell (**Figure 6C**). In contrast, cells kept in nominally 0  $\mu\text{M}$  extracellular  $\text{Ca}^{2+}$  showed no peripheral increase in  $\text{Ca}^{2+}$  signal (**Figure 6B**).

In contrast to the peripheral accumulation of signal in hair cells incubated with perilymph alone, the addition of inhibitors of both IP3 receptors (10  $\mu\text{M}$  2-APB) and ryanodine (100  $\mu\text{M}$  dantrolene) resulted in a marked reduction in the intensity of  $\text{Ca}^{2+}$  signal (**Figure 7**). These findings were reflected in the gradient in peripheral  $\text{Ca}^{2+}$  signal that was significantly attenuated in the presence of these two inhibitors (**Figure 7**). We conclude that peripheral  $\text{Ca}^{2+}$  signal in hair cells is increased by physiological concentrations of extracellular  $\text{Ca}^{2+}$  that in turn induces local CICR.

### **8-br-cAMP increases the local $\text{Ca}^{2+}$ concentration, particularly at the periphery of the cell.**

We determined the effects of raising cAMP levels while monitoring intracellular  $\text{Ca}^{2+}$ . **Figure 8** shows the effects of 100  $\mu\text{M}$  8-br-cAMP, the cell-permeable analog of cAMP that activates PKA, on intracellular  $\text{Ca}^{2+}$  concentration. We note a spike in  $\text{Ca}^{2+}$  concentration that followed treatment with 8-br-cAMP (**Figure 8**). The increase in  $\text{Ca}^{2+}$  signal was most notable along the periphery of the cell. In contrast, cells pretreated with 100  $\mu\text{M}$  dantrolene and 100  $\mu\text{M}$  2-APB showed minimal to no increase in the size of the  $\text{Ca}^{2+}$  signal. Since the  $\text{Ca}^{2+}$  signal was significantly attenuated, and particularly along the periphery of the cell, by treating with IP3 and ryanodine antagonists, we used the  $\text{Ca}^{2+}$  signal in the entire cell for these comparisons. These data confirm that PKA activation increases peripheral  $\text{Ca}^{2+}$  concentrations by CICR.

**We made estimates of  $\text{Ca}^{2+}$  concentration in hair cells incubated in bath solution that approximated that of perilymph.**

Our cumulative data suggest a high concentration of  $\text{Ca}^{2+}$  in proximity to BK channels in the experimental conditions we used for our electrophysiological recordings. Prior work has demonstrated BK channels to lie in proximity to VGCCs at the periphery of the cell (Roberts et al., 1990; Issa and Hudspeth, 1994; Samaranayake et al., 2004). We sought to determine the concentration of  $\text{Ca}^{2+}$  along the periphery of the cell in the presence of perilymph. For these experiments, we calibrated the  $\text{Ca}^{2+}$  fluorescence by using the  $\text{Ca}^{2+}$  ionophore A23187 and incubated cells in different concentrations of external  $\text{Ca}^{2+}$  for 30 minutes before measuring  $\text{Ca}^{2+}$  signal (Dedkova et al., 2000). In **Figure 9**, we determine the concentration of  $\text{Ca}^{2+}$  along the periphery of hair cells incubated in perilymph to be in excess of 100  $\mu\text{M}$ . These data are in broad agreement with our electrophysiological data suggesting local concentrations of  $\text{Ca}^{2+}$  in excess of that required to activate BK channels.

**The Slo channel clusters with both IP3 and ryanodine receptors along the periphery of the cell where they lie within a hundred nanometers of each other.**

Since hair cells contain high concentrations of  $\text{Ca}^{2+}$  buffer that are thought to provide significant spatiotemporal buffering, we sought to determine the localization of IP3 receptors and ryanodine receptors in hair cells in relationship to BK channels. For these experiments, we localized Slo, the BK alpha subunit, a key constituent of the BK channel complex, and the IP3 receptor using immunolabeling. We used STORM/ PALM super-resolution microscopy for these experiments. As shown in **Figure 10**, both these proteins were localized along the periphery of the cell. The proteins were clustered in close proximity with one another along the periphery of the cell. In

most clusters, we noted the proteins to lie in apposition in the 2D plane, or when separated to lie less than a hundred nanometers of one another. We see a similar distribution with clustering and close proximity between the Slo channel and ryanodine receptors. Here too, the proteins are closely approximated and lie less within nanometers from one another along the periphery of the cell (**Figure 10**). Using the nearest neighbor algorithm, we determine that the Slo channels lie as close as 5 nm from IP3 receptors the peak distances between these proteins lying between 55-85 nm (**Figure 11**). Similarly, Slo channels and ryanodine receptors lie as close as 15nm apart with the peak distribution of distances between Slo and ryanodine receptors lying between 85 and 135 nm (**Figure 11**). These data support the presence of nanodomains within these cells, similar to that in cartwheel inhibitory interneurons of the dorsal cochlear nucleus (Irie and Trussell, 2017). The super-resolution data are concordant with our electrophysiological and  $\text{Ca}^{2+}$  imaging data.

## Discussion

In this paper, we show for the first time the effects of CICR on BK channel function in hair cells of the chicken. We discovered the effects of CICR while exploring the effects of protein kinase A on BK channel kinetics in chick hair cells. We present three streams of data that substantiate our findings. Electrophysiological data showing a reduced current that was accompanied by a significant depolarizing shift in the I-V relationship with BAPTA compared to EGTA in nominally 0  $\mu\text{M}$   $\text{Ca}^{2+}$  suggested that higher spatial buffering afforded by BAPTA significantly limited  $\text{Ca}^{2+}$  available to activate BK channels. EGTA has a slower rate of  $\text{Ca}^{2+}$  binding (compared to BAPTA) and allows for more spatially diffuse  $\text{Ca}^{2+}$  signaling (Augustine et al., 1991; Rios and Stern, 1997; Neher, 1998). Preventing  $\text{Ca}^{2+}$  entry by blocking VGCCs and reducing extracellular  $\text{Ca}^{2+}$  both resulted in a depolarizing shift in the I-V relationship. These

data suggested that entry of extracellular  $\text{Ca}^{2+}$  is important for activation of BK channels likely by raising  $\text{Ca}^{2+}$  concentrations in the vicinity of BK channels clustered and co-localized with VGCCs at the plasma membrane of hair cells. Furthermore, when using EGTA as the intracellular buffer we note an increase in the size of current with no significant change in the I-V relationship when intracellular  $\text{Ca}^{2+}$  was raised from 0 to 10 and then to 100  $\mu\text{M}$   $\text{Ca}^{2+}$ . Since the use of BAPTA shifted the I-V relationship in a depolarizing direction compared to EGTA with comparable  $\text{Ca}^{2+}$  concentrations, these data suggest that 1. local concentrations of  $\text{Ca}^{2+}$  in the presence of EGTA were saturating and 2. recruiting more BK channels are effected by higher  $\text{Ca}^{2+}$  concentrations. Thus, we have a seeming paradox with increasing sizes of current that is not associated with a change in voltage sensitivity. When cells were perfused with forskolin we see a similar effect to that of raising pipette  $\text{Ca}^{2+}$  concentrations, namely an increase in the size of the current with no apparent change in voltage sensitivity. Since PKA is a well known activator of CICR and since the effects of PKA activation were dependent on pipette  $\text{Ca}^{2+}$  concentration, we reason that CICR is the principle mechanism by which PKA (and raising pipette  $\text{Ca}^{2+}$  concentrations) affects BK channels. A decrease in the size of the current with specific inhibitors to both IP3 and ryanodine receptors and its prevention of forskolin induced increases in BK currents confirmed the occurrence of CICR. Moreover, we note a rightward shift in current-voltage relationship when using 2-APB, a blocker of IP3 receptors, suggesting that local  $\text{Ca}^{2+}$  concentrations are affected by CICR. In all these experiments we used EGTA as an intracellular  $\text{Ca}^{2+}$  buffer, which has been used in prior experiments demonstrating electrical resonance in chick hair cells (Fuchs and Evans, 1988; Fuchs et al., 1988; Fuchs and Evans, 1990; Fuchs and Sokolowski, 1990). A recent report confirmed a similar effect of blocking ryanodine receptors (with dantrolene) on BK channels in the suprachiasmatic nucleus in a circadian rhythm (Whitt et



al., 2018). Imaging with the  $\text{Ca}^{2+}$  indicator dye Fluor-3-AM demonstrated high concentrations of  $\text{Ca}^{2+}$  along the periphery of hair cells that were clustered. We also confirmed a rise in intracellular  $\text{Ca}^{2+}$  concentrations in response to PKA activation. Our  $\text{Ca}^{2+}$  imaging data further confirmed reduced  $\text{Ca}^{2+}$  concentrations in response to PKA activation by inhibition of CICR. We additionally confirmed a decrease in peripheral  $\text{Ca}^{2+}$  concentrations in response to ryanodine and IP3 receptor inhibition. Moreover, measures of  $\text{Ca}^{2+}$  concentration using fluorescence at the periphery of the cell were concordant with our electrophysiological data and supersaturating. Finally, using super-resolution microscopy, we confirm the presence of both IP3 and ryanodine receptors to lie within 100 nm of BK channels along the periphery of the cell.

### **Nanodomains vs microdomains**

In sum, our data argue for a close approximation of BK channels and CICR. Over what distances does  $\text{Ca}^{2+}$  act? This is a key question as it will determine how electrical resonance is affected by CICR in hair cells. Nanodomains have been referred to over distances of 20 nm, while microdomains refer to distances of 200 nm (Neher, 1998). Using this definition, prior work in the frog saccule suggested microdomains of  $\text{Ca}^{2+}$  with synaptic release sites within 300 nm from  $\text{Ca}^{2+}$  channels (Roberts et al., 1990). While the high concentrations of local  $\text{Ca}^{2+}$  we observe and the differential responses to BAPTA and EGTA are consistent with nanodomains of  $\text{Ca}^{2+}$  (Heidelberger et al., 1994; Augustine et al., 2003), our measured distances between BK channels and IP3 and ryanodine receptors extend from distances consistent with nanodomains to intermediate distances between nanodomains and microdomains. The peak in distribution of distances between BK channels and IP3 receptors was 55-85 nm. In contrast, the peak in the distribution of distances between BK channels and ryanodine receptors lay between 100-135 nm.

### **How does PKA affect CICR?**

How might PKA activation influence CICR in hair cells? CICR has been a most well-studied phenomenon in muscle cells, endocrine cells, and neuronal cells (Roderick et al., 2003). ITPRs acting as coincident detectors (requiring both IP<sub>3</sub> and Ca<sup>2+</sup> for activation) and ryanodine receptors that respond to Ca<sup>2+</sup> have been well-studied in this context (Roderick et al., 2003). PKA increases CICR by affecting a multitude of processes in this cascade. Thus, PKA phosphorylates both ITP3Rs (ITP3R1 and ITP3R3) and ryanodine receptors 1 and 2 to increase their sensitivity to intracellular Ca<sup>2+</sup>, thus, increasing CICR (Islam et al., 1998, ; Holz et al., 1999; Reiken et al., 2003; Dyachok and Gylfe, 2004; Wehrens et al., 2006; Taylor, 2017 ). Interrogation of prior published chicken Affymetrix datasets reveals that ITPR1, 2, and 3 are all detected in the basilar papilla (Frucht et al., 2011). Similarly, RYR1, 2 and 3 are all detected in the basilar papilla with no significant differential distribution of these receptors along the tonotopic axis (Itp1, Itp2, and Ryr1 are also expressed in mouse inner and outer hair cells) (Frucht et al., 2011; Li et al., 2018). In addition to the effects on ITPRs and ryanodine receptors, PKA also modulates phospholipase C (PLC) and couples it to receptors strengthening CICR (Liu and Simon, 1996). Finally, PKA has been shown to phosphorylate Cav1.3 increasing its conductance (Mahapatra et al., 2012). Our data showing a block of PKA effects by inhibiting CICR suggests that the effects of PKA are predominantly effected through CICR and not through effects on Cav 1.3.

### **Effects on electrical resonance.**

What effects might CICR have on electrical resonance? While we did not explore the effects of PKA activation and CICR on electrical resonance, our initial impetus to studying PKA effects on BK currents was to explore how varying BK channel kinetics occur in hair cells along the tonotopic axis. Varying BK channel kinetics is the principal mechanism for frequency tuning and electrical resonance in the turtle (Art et al., 1995). There is data showing a similar mechanism operates in the chick (Fuchs et al., 1988; Fettiplace and Fuchs, 1999).

The close proximity of IP<sub>3</sub> and ryanodine receptors to BK channels could extend the distance of Ca<sup>2+</sup> signaling, thereby extending its operational range. This could explain the larger currents observed with CICR from an increasing number of BK channels activated farther from the site of Ca<sup>2+</sup> entry. On the other hand, CICR could simultaneously potentially attenuate the temporal fidelity of electrical resonance from the increased duration of feedback inhibition. Other variables that affect the sharpness of the negative feedback loop between voltage-gated Ca<sup>2+</sup> channels and BK channels are the distance between these two channels (estimated to be 50nm), the number of Ca<sup>2+</sup> and BK channels at these local clusters, and the effective buffering of the many different native Ca<sup>2+</sup> buffers (Roberts, 1993, 1994; Wu et al., 1995). Previous modeling experiments in the turtle have incorporated these variables and produced a reasonable approximation to experimental data (Wu et al., 1996). Our data showing CICR and its effects on BK channels would necessitate a rethinking of these models, particularly if CICR is shown to operate in the turtle, as well. With data showing complex control and kinetics of CICR in other systems, our data in turn point to increasingly complex control of electrical resonance (Dyachok and Gylfe, 2004).

Our data with whole-cell recordings showed no change in the voltage dependence of BK currents with 100  $\mu\text{M}$ , 10  $\mu\text{M}$  and nominally 0  $\mu\text{M}$  intracellular  $\text{Ca}^{2+}$  when EGTA was used as a buffer. On face value, these data could be taken to imply that the concentration of  $\text{Ca}^{2+}$  in proximity to BK channels are a 100  $\mu\text{M}$  even when the pipette  $\text{Ca}^{2+}$  concentration was nominally 0  $\mu\text{M}$   $\text{Ca}^{2+}$  owing to the limited spatial buffering of EGTA with (extracellular)  $\text{Ca}^{2+}$  entry occurring through voltage-gated channels. Our measurements of  $\text{Ca}^{2+}$  concentration as exceeding 100  $\mu\text{M}$ , albeit in the native state where buffering capacity is not precisely defined (hair cells contain mM concentrations of  $\text{Ca}^{2+}$  buffer), are consistent with this possibility..

The high local concentration of  $\text{Ca}^{2+}$  is also consistent with electrophysiological measurements of  $\text{Ca}^{2+}$  sensitivity of BK channels in these hair cells. Duncan et al., using excised patch recordings, demonstrated a half-maximal  $\text{Ca}^{2+}$  sensitivity of 0.1 – 5  $\mu\text{M}$   $\text{Ca}^{2+}$  at +50mV (the voltage at which our measurements of currents in whole-cell recordings were robust) (Duncan and Fuchs, 2003). Close to the resting membrane potential of hair cells (-50mV), these authors determine a half-maximal  $\text{Ca}^{2+}$  concentration of 5-100  $\mu\text{M}$  (although at the frequency location we used – 20-30% from the apical end- the concentration was closer to 5-50  $\mu\text{M}$ ).

The high local concentration of  $\text{Ca}^{2+}$  in proximity to BK channels from CICR could also explain the seeming discrepancy in in-vivo findings of minimal differences in  $\text{Ca}^{2+}$  sensitivity compared to the large differences in  $\text{Ca}^{2+}$  sensitivity observed when splice variants were expressed in heterologous systems (Art et al., 1995; Jones et al., 1999; Ramanathan et al., 1999; Ramanathan et al., 2000; Duncan and Fuchs, 2003). Excised patches used to determine sensitivity to  $\text{Ca}^{2+}$

would presumably also contain IP<sub>3</sub> and ryanodine receptors that in turn, would induce the local release of Ca<sup>2+</sup>.

### **Implications of CICR in hair cells.**

Synaptic vesicle release is the other mechanism that is affected by Ca<sup>2+</sup> entry into the base of hair cells. How might CICR affect synaptic release in hair cells? Increasing BK current size with no effects of its voltage sensitivity points to a spatially enlarging Ca<sup>2+</sup> signal with CICR in chick hair cells. A spatially extended Ca<sup>2+</sup> signal could also increase the release of synaptic vesicles. In fact, such a possibility has been suggested by experimental data in turtles (with corroborating data from mice and rats). Real-time measurements of synaptic release (capacitance measures) and Ca<sup>2+</sup> imaging show a linear and supralinear relationship between cell Ca<sup>2+</sup> and synaptic release in inner hair cells (Schnee et al., 2011). The supralinear release was correlated with an additional intracellular source of Ca<sup>2+</sup> and was speculated to be responsible for recruiting the reserve pool of vesicles.

In conclusion, we show that CICR resides in hair cells in close proximity to BK channels. We provide electrophysiological, confocal Ca<sup>2+</sup> imaging, and super-resolution fluorescence immunolocalization data to support our conclusion that CICR likely plays an important role in hair cell function. These data require a rethinking of the physiological and molecular mechanisms of electrical resonance and synaptic vesicle release.

**Figure 1.** Hair cells have a large outward potassium current. **A-D.** The outward current is reduced by the application of extracellular 20mM TEA. Shown are individual representative current recordings of a cell under voltage clamp before (**A**) and after (**B**) perfusion with extracellular TEA. Averaged I-V relationships (**C**) and paired averaged currents normalized to preperfusion currents (**D**) of cells perfused with TEA shows a marked reduction in the size of the current with TEA perfusion. (**C**). **E-H.** The size of the current is unaffected by 100  $\mu$ M 4AP. Shown are representative current recordings of an individual cell before (**E**) and after perfusion (**F**) with 4-AP. Averaged I-V relationships (**G**) and paired averaged currents normalized to preperfusion currents (**H**) of cells perfused with 4AP show no change in the size of the current with 4AP perfusion. **I-L.** The size of the current is partially reduced by 100  $\mu$ M of Penitrem A, a partial inhibitor of BK channels. Representative current recordings of cells under voltage clamp before (**I**) and after (**J**) perfusion with 100  $\mu$ M Penitrem A. Averaged I-V relationships (**K**) and paired averaged currents normalized to preperfusion currents (**L**) of cells perfused with Penitrem A show a moderate reduction in the size of the current with Penitrem A perfusion.

**Figure 2.** Hair cell BK currents are dependent on extra and intracellular  $\text{Ca}^{2+}$  that have different effects. **A-E** Extracellular  $\text{CdCl}_2$  reduces the size of the outward current. Representative current recordings of hair cells under voltage clamp before (**A**) and after (**B**) perfusion of 20  $\mu$ M  $\text{CdCl}_2$  into the extracellular bath solution. Averaged I-V relationships (**C**) and paired averaged currents normalized to preperfusion currents (**D**) of cells perfused with  $\text{CdCl}_2$  shows a reduction in the size of the current at comparable voltages with  $\text{CdCl}_2$  perfusion. Currents normalized to itself show a marked depolarizing shift in its I-V relationship (**E**). **F-J.** A similar effect is seen with

reducing extracellular  $\text{Ca}^{2+}$ . Shown are representative current recordings of hair cells under voltage clamp before (**F**) and after (**G**) perfusing with bath solution containing 3 mM EGTA. Averaged currents (**H**) and averaged paired currents normalized to currents before perfusion (**I**) show a reduction in the size of the currents with EGTA perfusion. Currents normalized to itself (**J**) confirm a rightward shift in its current-voltage relationship after reducing the extracellular  $\text{Ca}^{2+}$  concentration. **K-O**. Specific buffers and intracellular  $\text{Ca}^{2+}$  variably affect the size of the current and its I-V relationship. Shown are representative current recordings of hair cells under voltage clamp with nominally 0  $\mu\text{M}$   $\text{Ca}^{2+}$  buffered with BAPTA in the pipette (**K**), nominally 0  $\mu\text{M}$   $\text{Ca}^{2+}$  buffered with EGTA in the pipette (**L**) and 100  $\mu\text{M}$   $\text{Ca}^{2+}$  in the pipette (**M**). Averaged currents (**N**) show a reduction in the size of the currents with reducing intracellular  $\text{Ca}^{2+}$  that was especially marked with greater spatial buffering afforded by BAPTA. Currents normalized to itself (**O**) confirm a rightward shift in its current-voltage relationship with greater spatial buffering provided with BAPTA. In contrast, increasing pipette  $\text{Ca}^{2+}$  concentrations with EGTA as the buffer increased the size of the current without affecting the I-V relationship.

**Figure 3.** Forskolin increased the size of the outward current in a  $\text{Ca}^{2+}$  dependent manner. **A-C**. Representative current recordings of hair cells before (**A**) and after (**B**) perfusion with 100  $\mu\text{M}$  forskolin with the pipette containing 100  $\mu\text{M}$   $\text{Ca}^{2+}$ . The size of the outward current increased twofold when hair cells were perfused with 100  $\mu\text{M}$  forskolin evidenced in averaged currents (**C**), and averages of pre and post perfusion paired currents normalized to pre perfusion currents (**D**). Currents normalized to itself (**E**) to elicit voltage relationships are shown and confirm a non-significant change in  $V_{1/2}$ . **F-K**. In contrast, perfusion of hair cells with 100  $\mu\text{M}$  forskolin with nominally 0  $\mu\text{M}$  pipette  $\text{Ca}^{2+}$  (with EGTA as the intracellular buffer) did not cause an increase in

the size of the current or a change in its current-voltage relationship. Shown are representative current recordings of hair cells under voltage clamp before (**F**) and after (**G**) perfusion with 100  $\mu\text{M}$  forskolin. The averaged I-V relationship of cells before and after perfusion with forskolin compared to pre perfusion (**H**) and paired averaged currents from individual cells normalized to values before perfusion (**I**) confirm an absence of an effect on the size of the current. Currents normalized to itself (**J**) to elicit voltage relationships do not show an effect on its I-V relationship. **K-O**. Perfusion of hair cells with 0.5  $\mu\text{M}$  H-89, a well-known PKA blocker resulted in a reduction in the size of the current. Representative current recordings of cells under voltage clamp before (**K**) and after (**L**) perfusion with H-89 are shown. The averaged I-V relationships of cells before and after perfusion with H-89 (**M**) and averaged currents from individual cells pre and post perfusion normalized to values before perfusion (**N**) confirm a decrease in the size of the currents with H-89. Currents normalized to itself (**O**) to elicit voltage relationships show a non-significant change in  $V_{1/2}$ .

**Figure 4.** Blocking ryanodine receptors prevents a forskolin-induced increase in the outward current

**A-E.** The IV relationship of the outward current before and after perfusion with 100  $\mu\text{M}$  forskolin and 1  $\mu\text{M}$  Dantrolene shows a decrease in the size of the current with no change in the IV relationship. The pipette contained 100  $\mu\text{M}$   $\text{Ca}^{2+}$ . Shown are representative current recordings of cells under voltage clamp before (**A**) and after (**B**) perfusion with forskolin and dantrolene. Averaged currents (**C**) and averaged currents of pairs of currents before and after perfusion normalized to preperfusion currents (**D**) show an approximately 1/3 reduction in current in cells treated with both dantrolene and forskolin. Currents of cells in the two conditions



normalized to itself (**E**) show no change in  $V_{1/2}$ . **F-J**. A similar reduction in the size of the current with no change in the IV relationship is seen when hair cells are perfused with 1  $\mu\text{M}$  Dantrolene alone without forskolin. Here too, the pipette contained 100  $\mu\text{M}$   $\text{Ca}^{2+}$ . Shown are representative current recordings of cells under voltage clamp before (**F**) and after (**G**) perfusion with dantrolene. The averaged currents (**H**) and averaged currents of pairs of currents before and after perfusion normalized to pre-perfusion currents (**I**) show a reduction in the size of the current after perfusion with dantrolene. Here too, the reduction in the size of the current was approximately 1/3 indicating that the addition of forskolin had no additional effect in the presence of dantrolene. Currents of cells in the two conditions normalized to itself (**J**) show no change in  $V_{1/2}$ .

**Figure 5.** Blocking IP3 receptors prevents a forskolin-induced increase in the outward current.

**A-E.** The IV relationship of the outward current before and after perfusion with 100  $\mu\text{M}$  forskolin and 100  $\mu\text{M}$  2-APB shows a larger decrease in the size of the current. The pipette contained 100  $\mu\text{M}$   $\text{Ca}^{2+}$ . Shown are representative current recordings of cells under voltage clamp before (**A**) and after (**B**) perfusion with forskolin and dantrolene. Averaged currents (**C**) and averages of paired currents before and after perfusion normalized to preperfusion currents (averaged currents of pairs of currents before and after perfusion (**D**) demonstrate current values to be 40% of the current before perfusion with 2-APB and forskolin. Averages of currents normalized to itself (**E**) show a significant shift in  $V_{1/2}$  from -7 mV to 9 mV in cells treated with forskolin and 2-APB. **F-J.** A smaller reduction in the size of the current with a change in the IV relationship is seen when hair cells are perfused with 100  $\mu\text{M}$  2-APB alone without forskolin. Here too, the pipette contained 100  $\mu\text{M}$   $\text{Ca}^{2+}$ . Shown are representative current recordings of cells under voltage clamp before (**F**) and after (**G**) perfusion with 100  $\mu\text{M}$  2-APB. Averaged

currents (**H**) and averages of paired currents before and after perfusion normalized to preperfusion currents (averaged currents of pairs of currents before and after perfusion (**I**) show a smaller 1/3 decrease in the size of the current when cells were perfused with 2-APB alone. Averages of currents normalized to itself (**J**) show a small significant shift in  $V_{1/2}$  from -6 mV to 5 mV after perfusion with 2-APB.

**Figure 6.** In artificial perilymph, hair cells show high concentrations of peripheral  $\text{Ca}^{2+}$  in clusters.

**A.** Hair cells viewed end-on from above using confocal microscopy show high concentrations of peripheral  $\text{Ca}^{2+}$ .  $\text{Ca}^{2+}$  was detected after incubating cells in 1  $\mu\text{M}$  Fluor-3-AM in perilymph containing 1.3 mM  $\text{Ca}^{2+}$ . These high concentrations of  $\text{Ca}^{2+}$  are not uniformly spread along the periphery and are clustered. **B.** Hair cells incubated with 1  $\mu\text{M}$  Fluor-3 in perilymph containing nominally 0  $\mu\text{M}$   $\text{Ca}^{2+}$  for 30 minutes at room temperature are viewed end-on from above and show absent peripheral concentration of  $\text{Ca}^{2+}$  signal. Scale bar = 10  $\mu\text{m}$ . **C.** Hair cells in basilar papillae incubated with 1  $\mu\text{M}$  Fluor-3 in perilymph for 30 minutes at room temperature viewed side on show high concentrations of peripheral  $\text{Ca}^{2+}$ . Here too, the  $\text{Ca}^{2+}$  signal is clustered. Also, note increased signal in stereocilia and in the region of the cuticular plate. Scale bar = 5  $\mu\text{m}$ .

**Figure 7.** In perilymph, hair cells do not show high concentrations of peripheral  $\text{Ca}^{2+}$  in the presence of inhibitors of CICR.

**A.** Control cells incubated in 1  $\mu\text{M}$  Fluor-3-AM in perilymph (1.3 mM  $\text{Ca}^{2+}$ ) for 30 minutes shows a peripheral accumulation of  $\text{Ca}^{2+}$  along the periphery of the cell. Data were acquired using a spinning disc confocal microscope with the cells viewed end on from above. **B, C.**

Addition of 100  $\mu\text{M}$  2-APB (B) or 1  $\mu\text{M}$  dantrolene (C) both prevent an increase in the peripheral accumulation of  $\text{Ca}^{2+}$ . **D.** These effects of inhibitors of CICR were quantified. Shown is the cumulative  $\text{Ca}^{2+}$  signal in the peripheral 2/3 of the cell viewed end-on. In the presence of inhibitors of CICR, there is a significant reduction in the accumulation of peripheral  $\text{Ca}^{2+}$  signal as a percentage of the signal in the entire cell ( $P < 0.01$ , one-way ANOVA). Scale bar = 5  $\mu\text{m}$ .

**Figure 8.** Addition of 8-br-cAMP increases  $\text{Ca}^{2+}$  signal in hair cells that is attenuated in the presence of inhibitors of CICR

**A.** Shown are  $\text{Ca}^{2+}$  fluorescence signal (detected after incubating cells in 1  $\mu\text{M}$  Fluor-3-AM in perilymph containing 1.3 mM  $\text{Ca}^{2+}$  for 30 minutes) in hair cells as a function of time. The addition of 100  $\mu\text{M}$  8-br-cAMP (arrow) resulted in an increase in  $\text{Ca}^{2+}$  in the cell above the exponential decay in fluorescence due to photobleaching. In contrast, the presence of 2-APB and dantrolene (both inhibitors of CICR) attenuated (2-APB) and eliminated (dantrolene) the increase in  $\text{Ca}^{2+}$  signal induced by 100  $\mu\text{M}$  8-br-cAMP. In order to make comparable measurements,  $\text{Ca}^{2+}$  signal in the entire cell was measured, since inhibitors of CICR caused a significant reduction in peripheral  $\text{Ca}^{2+}$  signal. The lowest panel shows the increase in  $\text{Ca}^{2+}$  signal from which the exponential decay from photobleaching was subtracted. In this panel, the fluorescence signal was synchronized to the point at which 8-br-cAMP was added. Error bars are SEM. **B,C,D,E,F,G.**  $\text{Ca}^{2+}$  imaging of individual hair cells before (B - 8-br-cAMP alone, D - 8-br-cAMP plus 2-APB, F - 8-br-cAMP plus Dantrolene) and after (C - 8-br-cAMP alone, E - 8-br-cAMP plus 2-APB, G - 8-br-cAMP plus Dantrolene) treatment with 8-Br cAMP. Cells

were preloaded with 1  $\mu\text{M}$  Fluor3 and the respective inhibitors for 30 minutes at 4<sup>0</sup> C in perilymph containing 1.3 mM  $\text{Ca}^{2+}$ .

**Figure 9.**  $\text{Ca}^{2+}$  concentrations at the periphery of hair cells exceed a 100  $\mu\text{M}$ .

Shown is the average fluorescence intensity of hair cells with different bath concentrations of  $\text{Ca}^{2+}$ . Basilar papillae from chicks were incubated in the presence of the  $\text{Ca}^{2+}$  ionophore A23187 and different concentrations of  $\text{Ca}^{2+}$  (nominally 0  $\mu\text{M}$   $\text{Ca}^{2+}$ , 5  $\mu\text{M}$   $\text{Ca}^{2+}$ , 25  $\mu\text{M}$   $\text{Ca}^{2+}$ , 50  $\mu\text{M}$   $\text{Ca}^{2+}$  and 100  $\mu\text{M}$   $\text{Ca}^{2+}$ ). Fluorescence (in arbitrary units) was measured away from clusters to prevent CICR skewing our data. Measurements from 8-12 cells were averaged. Also shown (in red) is the average fluorescence intensity of  $\text{Ca}^{2+}$  clusters along the periphery of the cell in hair cells incubated in the presence of perilymph containing 1.3 mM  $\text{Ca}^{2+}$ . The concentration of  $\text{Ca}^{2+}$  is in excess of 100  $\mu\text{M}$  based on its fluorescence measures. Using a linear trendline, we estimate a value of 150  $\mu\text{M}$   $\text{Ca}^{2+}$ . In all these measures we averaged the fluorescence from clusters at the periphery of 8-10 hair cells.

**Figure 10.** Slo channels lie in close proximity to IP3 receptors and ryanodine receptors.

STORM images of individual hair cells in the basilar papilla are visualized end on from above.

**A,B.** Slo channel puncta (purple) are localized in close proximity to IP3 receptors (orange) in low (A) and higher magnifications (B). Slo channel puncta lie close to the membrane with IP3 receptors arranged tangentially away from the membrane. In many instances, we could not separate the two clusters in two dimensions. Where such separation was possible, the distance

between the clusters was usually less than 100 nm (see below). **C.** Slo channels (orange) are also seen in proximity to ryanodine receptors (purple). Here too, the two protein clusters were often not separable in two dimensions. Where the clusters were separable, the distance between them was usually less than 150 nm (see below).

**Figure 11.** Slo, IP3 receptors, and ryanodine receptors are clustered and lie within nano-micro domains. **A.** Slo, IP3 and ryanodine receptors were clustered. Shown is the distribution in the density of particles and its variability with cluster number. The histogram of binned data shows a skewed distribution in particles. Both Slo/IP3 and Slo/ryanodine clusters show similar patterns of clustering. There was over a tenfold range in particle density in clusters. **B.** Using a Nearest Neighbor algorithm, we find a skewed distribution in the distances between Slo and IP3 receptors, and, separately, Slo and ryanodine receptors. Shown are histograms of crossed (that is centroids of Slo and IP3 particles, and, separately, centroids of Slo and ryanodine particles) nearest neighbor distances. The distances between Slo and IP3 receptors started at 5 nm, and the distances between Slo and ryanodine receptors started at 15nm. The peak in the distribution of distances between Slo and IP3 lay between 55 and 85 nm. The peak in distribution of distances between Slo and ryanodine receptors lay between 100 and 135 nm. Using a 200 nm cutoff radius, the median nearest neighbor distance was 85nm for Slo/IP3 particles, and 100nm for Slo/ryanodine receptor particles.

Art JJ, Wu YC, Fettiplace R (1995) The calcium-activated potassium channels of turtle hair cells. *The Journal of general physiology* 105:49-72.

Augustine GJ, Adler EM, Charlton MP (1991) The calcium signal for transmitter secretion from presynaptic nerve terminals. *Ann N Y Acad Sci* 635:365-381.

Augustine GJ, Santamaria F, Tanaka K (2003) Local calcium signaling in neurons. *Neuron* 40:331-346.

- Bai JP, Surguchev A, Navaratnam D (2011) beta4-subunit increases Slo responsiveness to physiological Ca<sup>2+</sup> concentrations and together with beta1 reduces surface expression of Slo in hair cells. *Am J Physiol Cell Physiol* 300:C435-446.
- Bai JP, Surguchev A, Navaratnam D (2012a) beta4-subunit increases Slo responsiveness to physiological Ca<sup>2+</sup> concentrations and together with beta1 reduces surface expression of Slo in hair cells. *Am J Physiol Cell Physiol* 300:C435-446.
- Bai JP, Surguchev A, Joshi P, Gross L, Navaratnam D (2012b) CDK5 interacts with Slo and affects its surface expression and kinetics through direct phosphorylation. *Am J Physiol Cell Physiol* 302:C766-780.
- Brenner R, Jegla TJ, Wickenden A, Liu Y, Aldrich RW (2000) Cloning and functional characterization of novel large conductance calcium-activated potassium channel beta subunits, hKCNMB3 and hKCNMB4. *J Biol Chem* 275:6453-6461.
- Brenner R, Chen QH, Vilaythong A, Toney GM, Noebels JL, Aldrich RW (2005) BK channel beta4 subunit reduces dentate gyrus excitability and protects against temporal lobe seizures. *Nat Neurosci* 8:1752-1759.
- Chen L, Tian L, MacDonald SH, McClafferty H, Hammond MS, Huibant JM, Ruth P, Knaus HG, Shipston MJ (2005) Functionally diverse complement of large conductance calcium- and voltage-activated potassium channel (BK) alpha-subunits generated from a single site of splicing. *J Biol Chem* 280:33599-33609.
- Crawford AC, Fettiplace R (1981) An electrical tuning mechanism in turtle cochlear hair cells. *J Physiol* 312:377-412.
- Dedkova EN, Sigova AA, Zinchenko VP (2000) Mechanism of action of calcium ionophores on intact cells: ionophore-resistant cells. *Membr Cell Biol* 13:357-368.
- Duncan RK, Fuchs PA (2003) Variation in large-conductance, calcium-activated potassium channels from hair cells along the chicken basilar papilla. *J Physiol* 547:357-371.
- Dyachok O, Gylfe E (2004) Ca<sup>2+</sup>-induced Ca<sup>2+</sup> release via inositol 1,4,5-trisphosphate receptors is amplified by protein kinase A and triggers exocytosis in pancreatic beta-cells. *J Biol Chem* 279:45455-45461.
- Fettiplace R, Fuchs PA (1999) Mechanisms of hair cell tuning. *Annual review of physiology* 61:809-834.
- Frucht CS, Uduman M, Kleinstein SH, Santos-Sacchi J, Navaratnam DS (2011) Gene expression gradients along the tonotopic axis of the chicken auditory epithelium. *Journal of the Association for Research in Otolaryngology : JARO* 12:423-435.
- Fuchs PA, Evans MG (1988) Voltage oscillations and ionic conductances in hair cells isolated from the alligator cochlea. *J Comp Physiol A* 164:151-163.
- Fuchs PA, Evans MG (1990) Potassium currents in hair cells isolated from the cochlea of the chick. *J Physiol* 429:529-551.
- Fuchs PA, Sokolowski BH (1990) The acquisition during development of Ca-activated potassium currents by cochlear hair cells of the chick. *Proc Biol Sci* 241:122-126.
- Fuchs PA, Nagai T, Evans MG (1988) Electrical tuning in hair cells isolated from the chick cochlea. *J Neurosci* 8:2460-2467.
- Gan G, Yi H, Chen M, Sun L, Li W, Wu Y, Ding J (2008) Structural basis for toxin resistance of beta4-associated calcium-activated potassium (BK) channels. *J Biol Chem* 283:24177-24184.
- Heidelberger R, Heinemann C, Neher E, Matthews G (1994) Calcium dependence of the rate of exocytosis in a synaptic terminal. *Nature* 371:513-515.

- Holz GG, Leech CA, Heller RS, Castonguay M, Habener JF (1999) cAMP-dependent mobilization of intracellular Ca<sup>2+</sup> stores by activation of ryanodine receptors in pancreatic beta-cells. A Ca<sup>2+</sup> signaling system stimulated by the insulinotropic hormone glucagon-like peptide-1-(7-37). *J Biol Chem* 274:14147-14156.
- Irie T, Trussell LO (2017) Double-Nanodomain Coupling of Calcium Channels, Ryanodine Receptors, and BK Channels Controls the Generation of Burst Firing. *Neuron* 96:856-870 e854.
- Islam MS, Leibiger I, Leibiger B, Rossi D, Sorrentino V, Ekstrom TJ, Westerblad H, Andrade FH, Berggren PO (1998) In situ activation of the type 2 ryanodine receptor in pancreatic beta cells requires cAMP-dependent phosphorylation. *Proc Natl Acad Sci U S A* 95:6145-6150.
- Issa NP, Hudspeth AJ (1994) Clustering of Ca<sup>2+</sup> channels and Ca(2+)-activated K<sup>+</sup> channels at fluorescently labeled presynaptic active zones of hair cells. *Proc Natl Acad Sci U S A* 91:7578-7582.
- Jones EM, Gray-Keller M, Art JJ, Fettiplace R (1999) The functional role of alternative splicing of Ca(2+)-activated K<sup>+</sup> channels in auditory hair cells. *Ann N Y Acad Sci* 868:379-385.
- Jones SM, Jones TA (1995) The tonotopic map of the embryonic chick cochlea. *Hear Res* 82:149-157.
- Li Y, Liu H, Giffen KP, Chen L, Beisel KW, He DZZ (2018) Transcriptomes of cochlear inner and outer hair cells from adult mice. *Sci Data* 5:180199.
- Liu M, Simon MI (1996) Regulation by cAMP-dependent protein kinase of a G-protein-mediated phospholipase C. *Nature* 382:83-87.
- Mahapatra S, Marcantoni A, Zuccotti A, Carabelli V, Carbone E (2012) Equal sensitivity of Cav1.2 and Cav1.3 channels to the opposing modulations of PKA and PKG in mouse chromaffin cells. *J Physiol* 590:5053-5073.
- Meera P, Wallner M, Toro L (2000) A neuronal beta subunit (KCNMB4) makes the large conductance, voltage- and Ca<sup>2+</sup>-activated K<sup>+</sup> channel resistant to charybdotoxin and iberiotoxin. *Proc Natl Acad Sci U S A* 97:5562-5567.
- Miranda-Rottmann S, Kozlov AS, Hudspeth AJ (2010) Highly specific alternative splicing of transcripts encoding BK channels in the chicken's cochlea is a minor determinant of the tonotopic gradient. *Mol Cell Biol* 30:3646-3660.
- Neher E (1998) Vesicle pools and Ca<sup>2+</sup> microdomains: new tools for understanding their roles in neurotransmitter release. *Neuron* 20:389-399.
- Purcell EK, Liu L, Thomas PV, Duncan RK (2011) Cholesterol influences voltage-gated calcium channels and BK-type potassium channels in auditory hair cells. *PLoS One* 6:e26289.
- Ramanathan K, Michael TH, Fuchs PA (2000) beta subunits modulate alternatively spliced, large conductance, calcium-activated potassium channels of avian hair cells. *J Neurosci* 20:1675-1684.
- Ramanathan K, Michael TH, Jiang GJ, Hiel H, Fuchs PA (1999) A molecular mechanism for electrical tuning of cochlear hair cells. *Science* 283:215-217.
- Reiken S, Lacampagne A, Zhou H, Kherani A, Lehnart SE, Ward C, Huang F, Gaburjakova M, Gaburjakova J, Rosemblyt N, Warren MS, He KL, Yi GH, Wang J, Burkhoff D, Vassort G, Marks AR (2003) PKA phosphorylation activates the calcium release channel (ryanodine receptor) in skeletal muscle: defective regulation in heart failure. *J Cell Biol* 160:919-928.

- Reinhart PH, Chung S, Levitan IB (1989) A family of calcium-dependent potassium channels from rat brain. *Neuron* 2:1031-1041.
- Ricci AJ, Bai JP, Song L, Lv C, Zenisek D, Santos-Sacchi J (2013) Patch-clamp recordings from lateral line neuromast hair cells of the living zebrafish. *J Neurosci* 33:3131-3134.
- Rios E, Stern MD (1997) Calcium in close quarters: microdomain feedback in excitation-contraction coupling and other cell biological phenomena. *Annu Rev Biophys Biomol Struct* 26:47-82.
- Roberts WM (1993) Spatial calcium buffering in saccular hair cells. *Nature* 363:74-76.
- Roberts WM (1994) Localization of calcium signals by a mobile calcium buffer in frog saccular hair cells. *J Neurosci* 14:3246-3262.
- Roberts WM, Jacobs RA, Hudspeth AJ (1990) Colocalization of ion channels involved in frequency selectivity and synaptic transmission at presynaptic active zones of hair cells. *J Neurosci* 10:3664-3684.
- Roderick HL, Berridge MJ, Bootman MD (2003) Calcium-induced calcium release. *Curr Biol* 13:R425.
- Sabourin J, Boet A, Rucker-Martin C, Lambert M, Gomez AM, Benitah JP, Perros F, Humbert M, Antigny F (2018) Ca(2+) handling remodeling and STIM1L/Orai1/TRPC1/TRPC4 upregulation in monocrotaline-induced right ventricular hypertrophy. *J Mol Cell Cardiol* 118:208-224.
- Samaranayake H, Saunders JC, Greene MI, Navaratnam DS (2004) Ca(2+) and K(+) (BK) channels in chick hair cells are clustered and colocalized with apical-basal and tonotopic gradients. *J Physiol* 560:13-20.
- Saunders JC, Coles RB, Gates GR (1973) The development of auditory evoked responses in the cochlea and cochlear nuclei of the chick. *Brain Res* 63:59-74.
- Schnee ME, Santos-Sacchi J, Castellano-Munoz M, Kong JH, Ricci AJ (2011) Calcium-dependent synaptic vesicle trafficking underlies indefatigable release at the hair cell afferent fiber synapse. *Neuron* 70:326-338.
- Surguchev A, Bai JP, Joshi P, Navaratnam D (2012) Hair cell BK channels interact with RACK1, and PKC increases its expression on the cell surface by indirect phosphorylation. *Am J Physiol Cell Physiol* 303:C143-150.
- Tadevosyan A, Xiao J, Surinkaew S, Naud P, Merlen C, Harada M, Qi X, Chatenet D, Fournier A, Allen BG, Nattel S (2017) Intracellular Angiotensin-II Interacts With Nuclear Angiotensin Receptors in Cardiac Fibroblasts and Regulates RNA Synthesis, Cell Proliferation, and Collagen Secretion. *J Am Heart Assoc* 6.
- Taylor CW (2017) Regulation of IP3 receptors by cyclic AMP. *Cell Calcium* 63:48-52.
- Tian L, Duncan RR, Hammond MS, Coghill LS, Wen H, Rusinova R, Clark AG, Levitan IB, Shipston MJ (2001) Alternative splicing switches potassium channel sensitivity to protein phosphorylation. *J Biol Chem* 276:7717-7720.
- Tilney LG, Tilney MS, Saunders JS, DeRosier DJ (1986) Actin Filaments, stereocillia, and hair cells of the bird cochlea III. The development of differentiation of hair cells and stereocillia. *Devl Biol* 116:100-118.
- Wehrens XH, Lehnart SE, Reiken S, Vest JA, Wronska A, Marks AR (2006) Ryanodine receptor/calcium release channel PKA phosphorylation: a critical mediator of heart failure progression. *Proc Natl Acad Sci U S A* 103:511-518.



- Whitt JP, McNally BA, Meredith AL (2018) Differential contribution of Ca(2+) sources to day and night BK current activation in the circadian clock. *The Journal of general physiology* 150:259-275.
- Wu YC, Tucker T, Fettiplace R (1996) A theoretical study of calcium microdomains in turtle hair cells. *Biophys J* 71:2256-2275.
- Wu YC, Art JJ, Goodman MB, Fettiplace R (1995) A kinetic description of the calcium-activated potassium channel and its application to electrical tuning of hair cells. *Prog Biophys Mol Biol* 63:131-158.

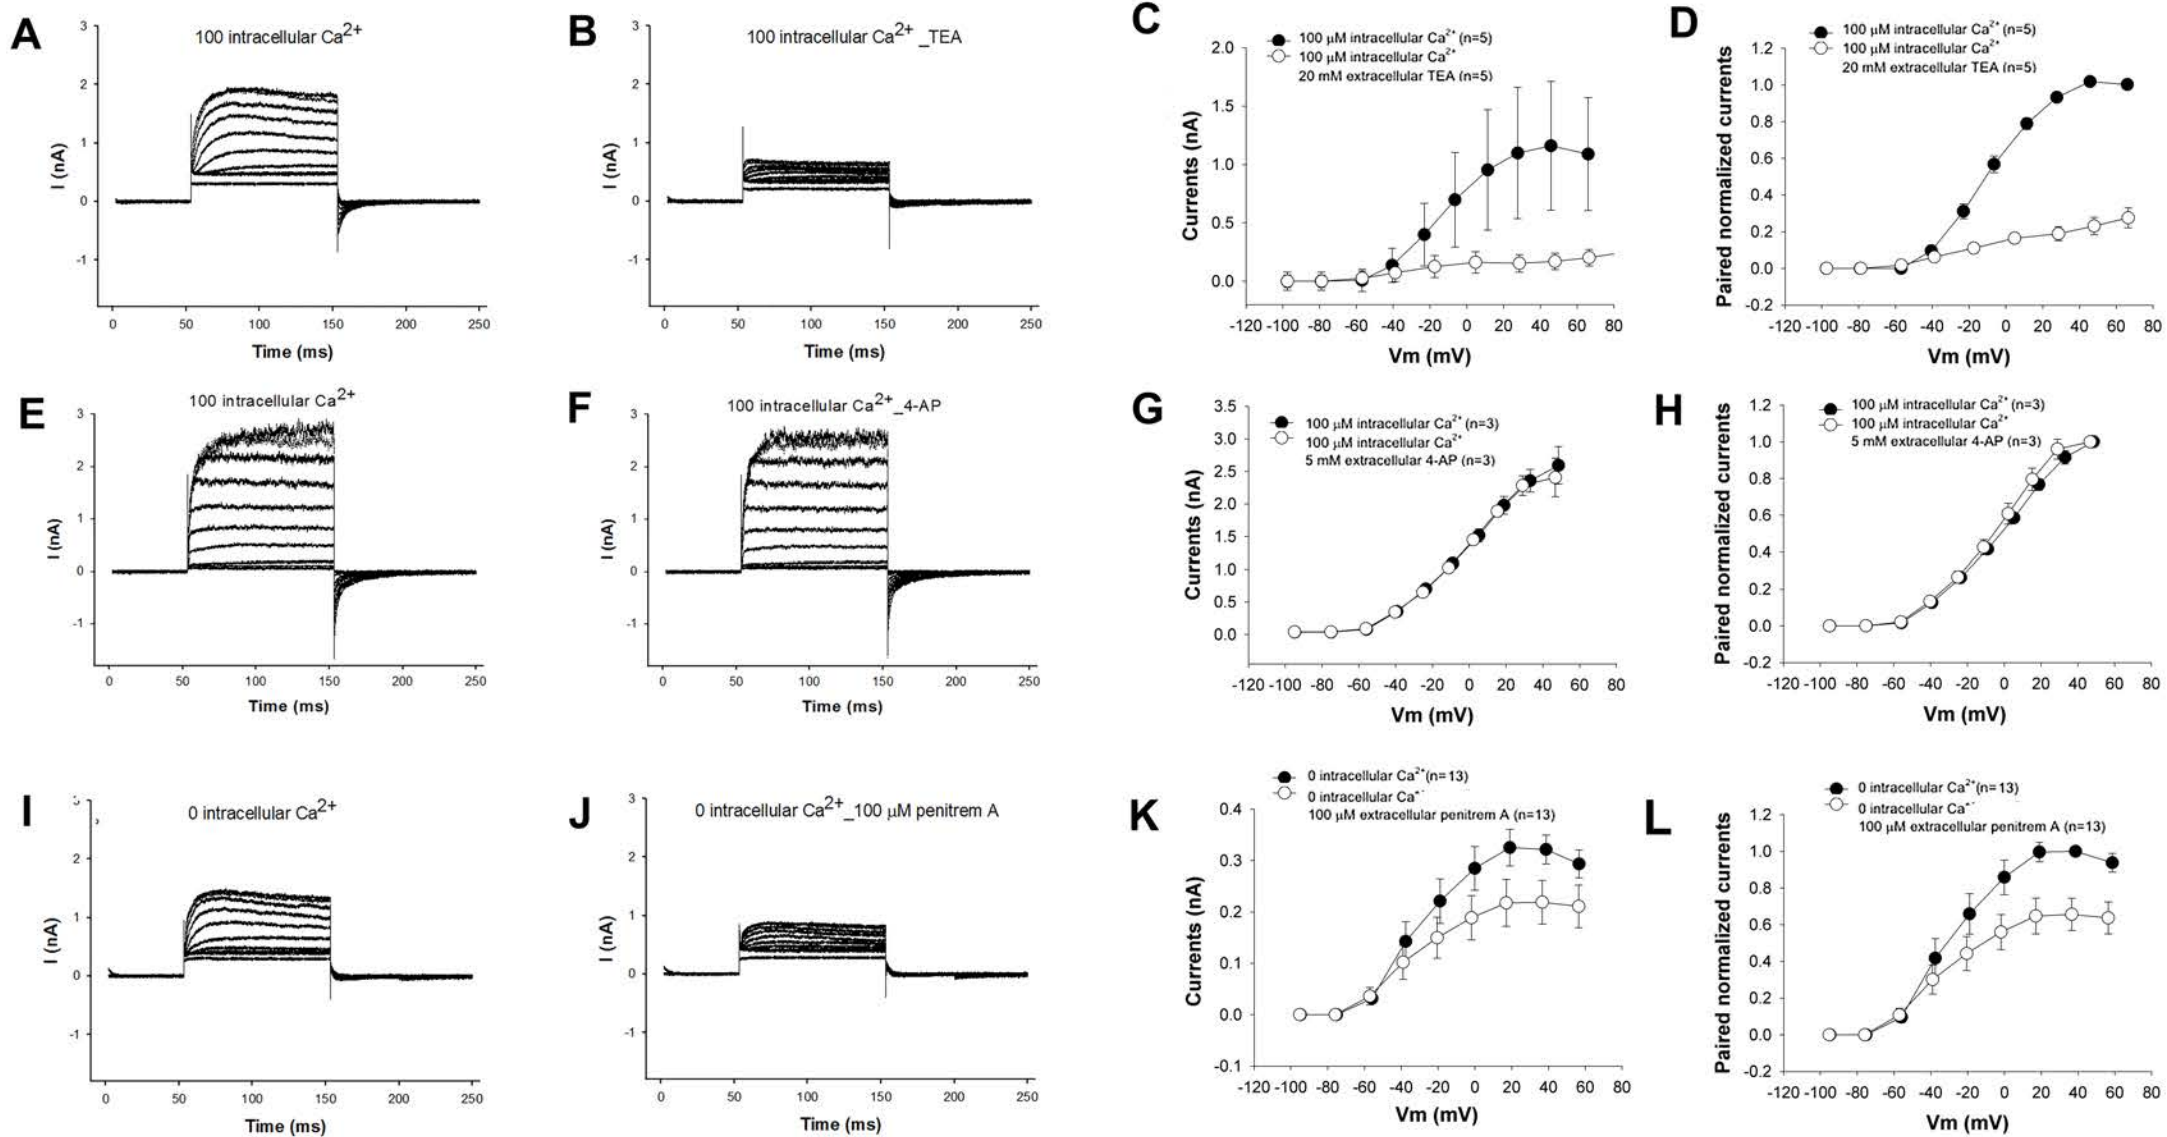

Figure 1

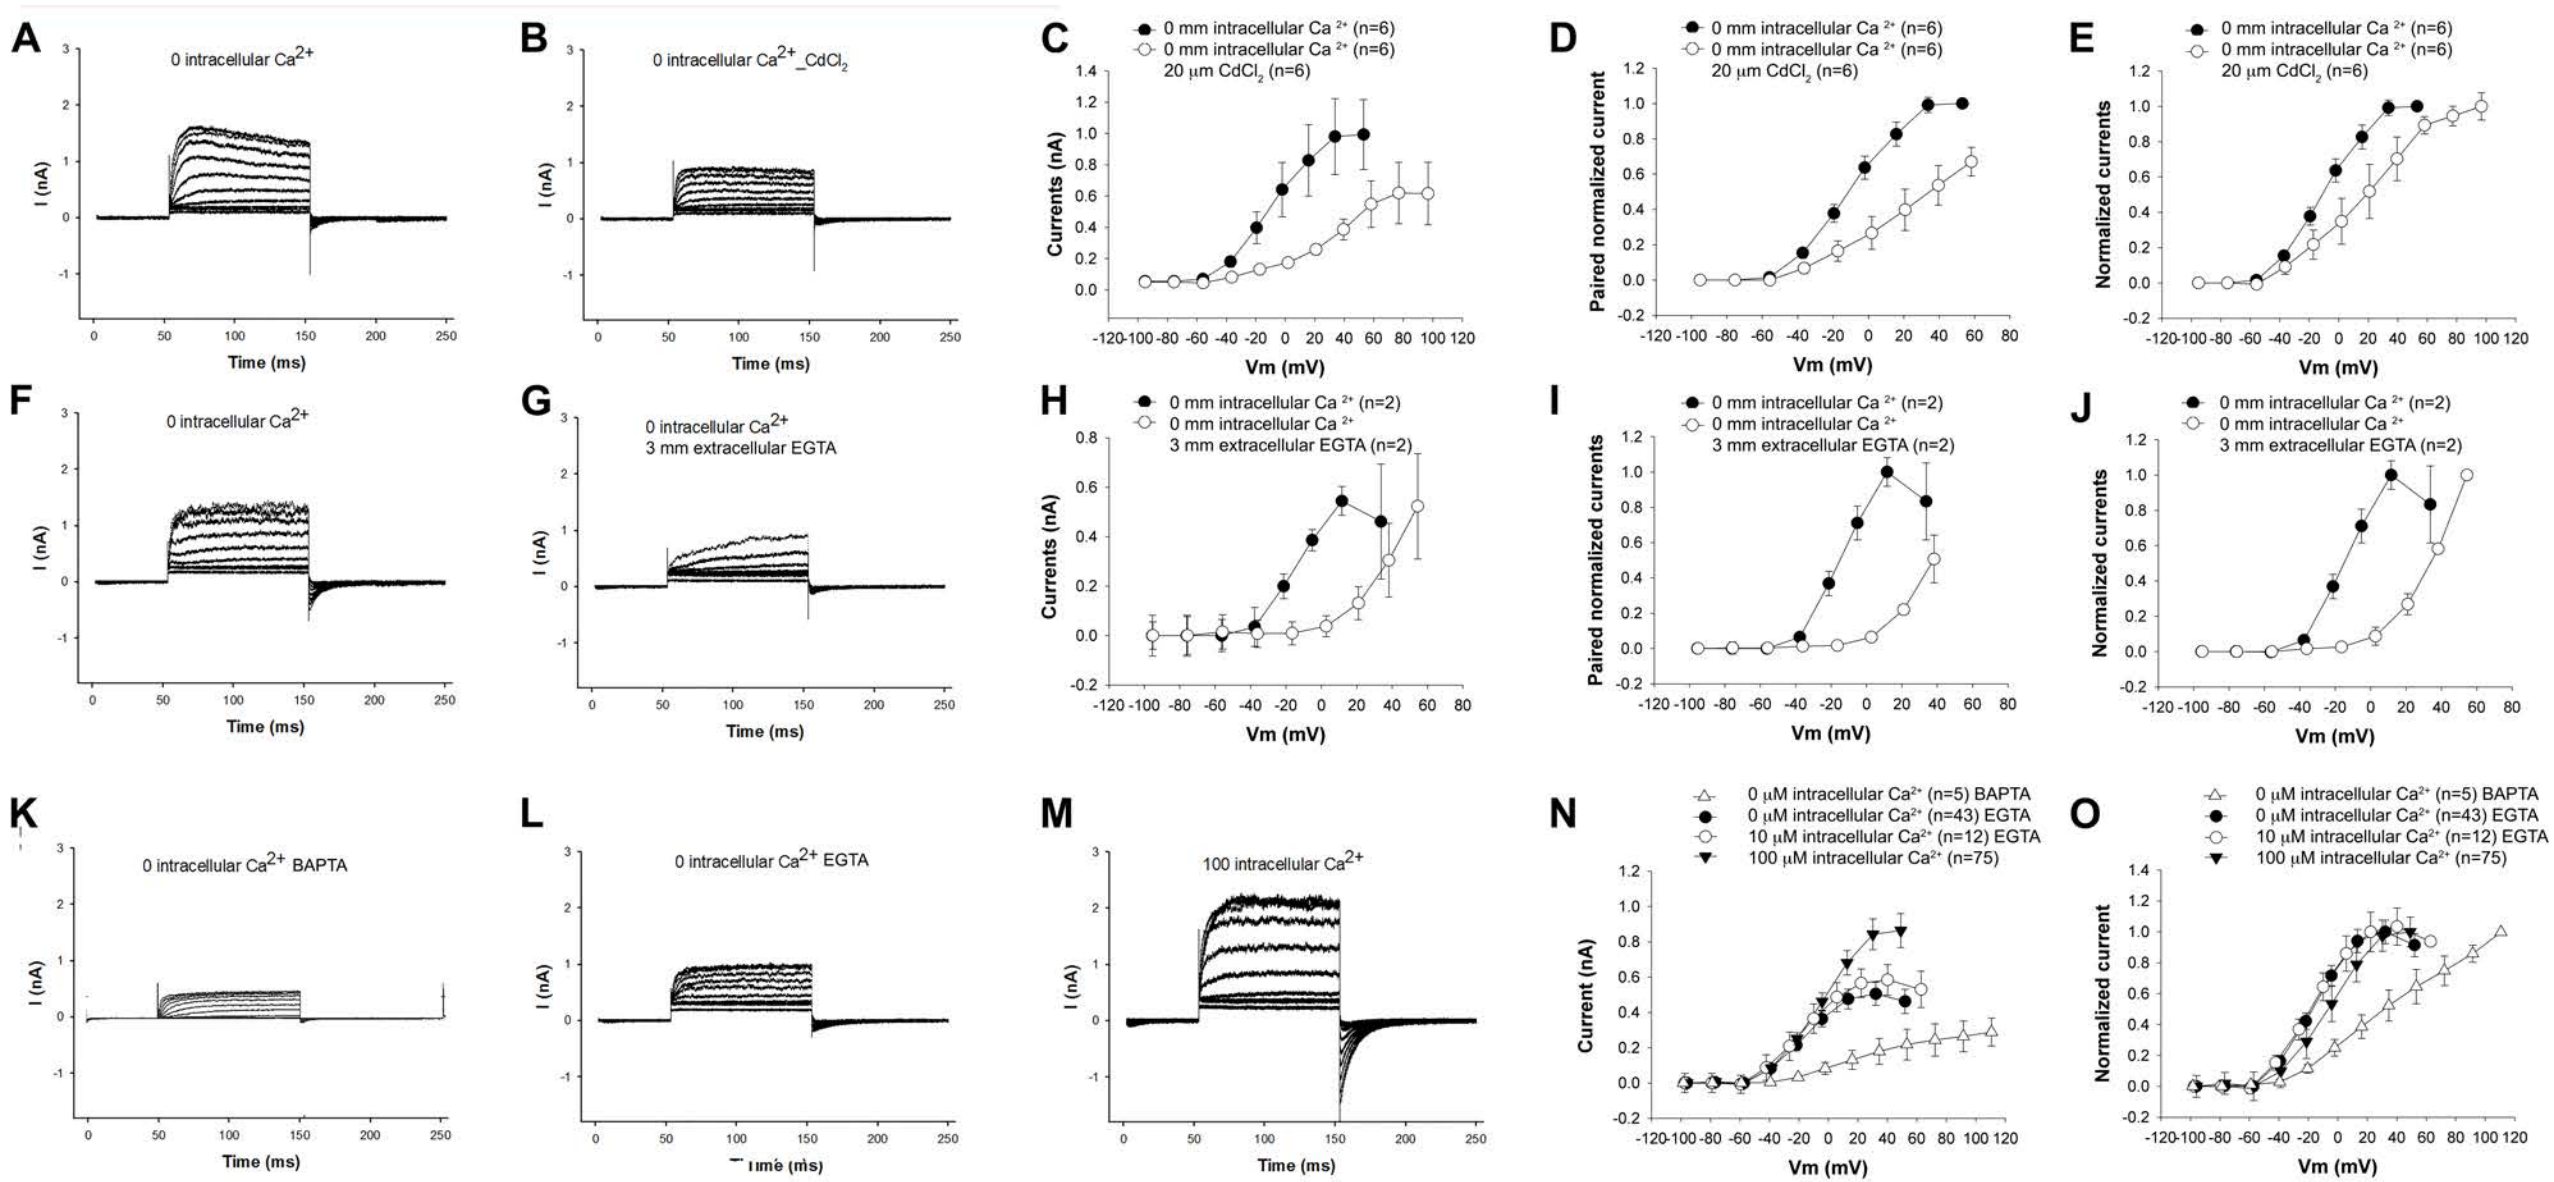

Figure 2

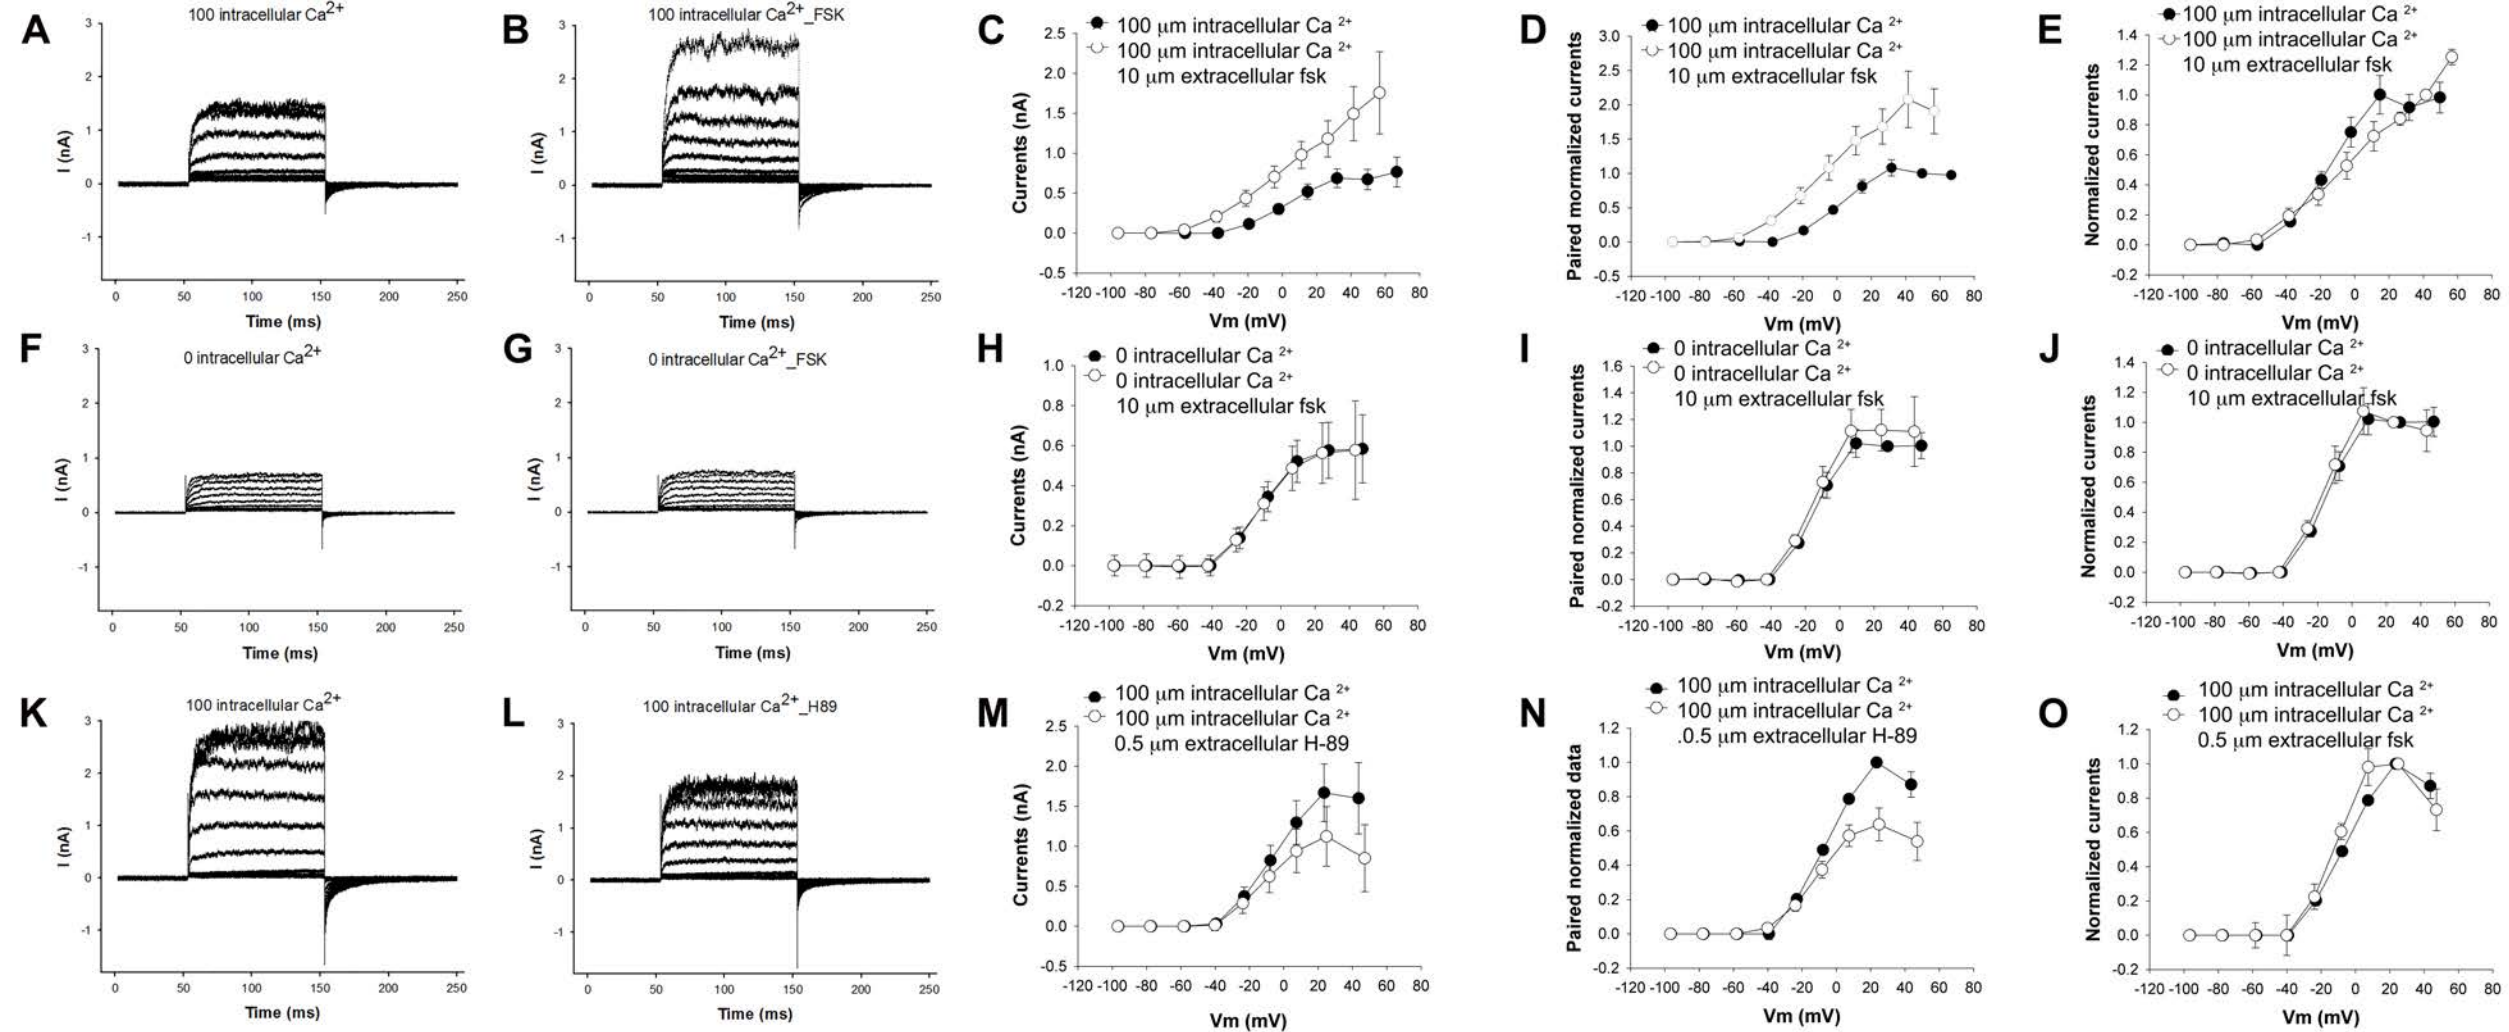

Figure 3

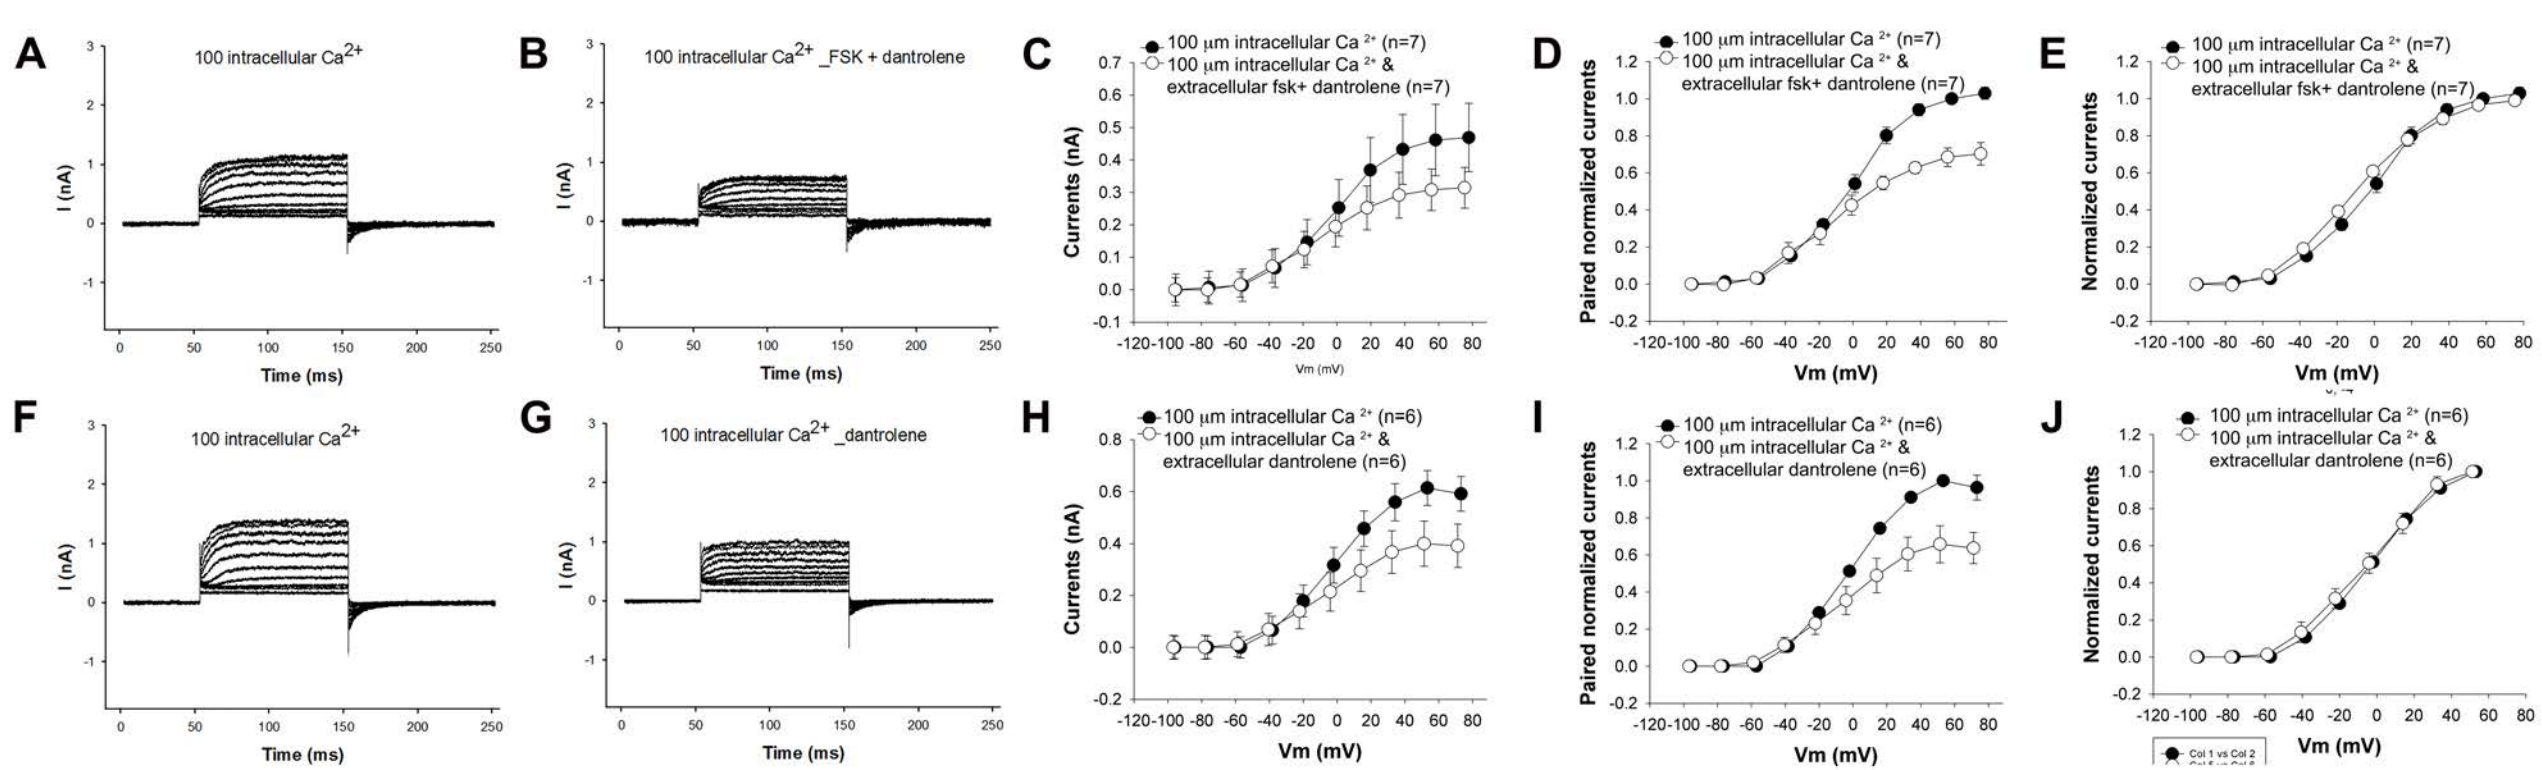

Figure 4

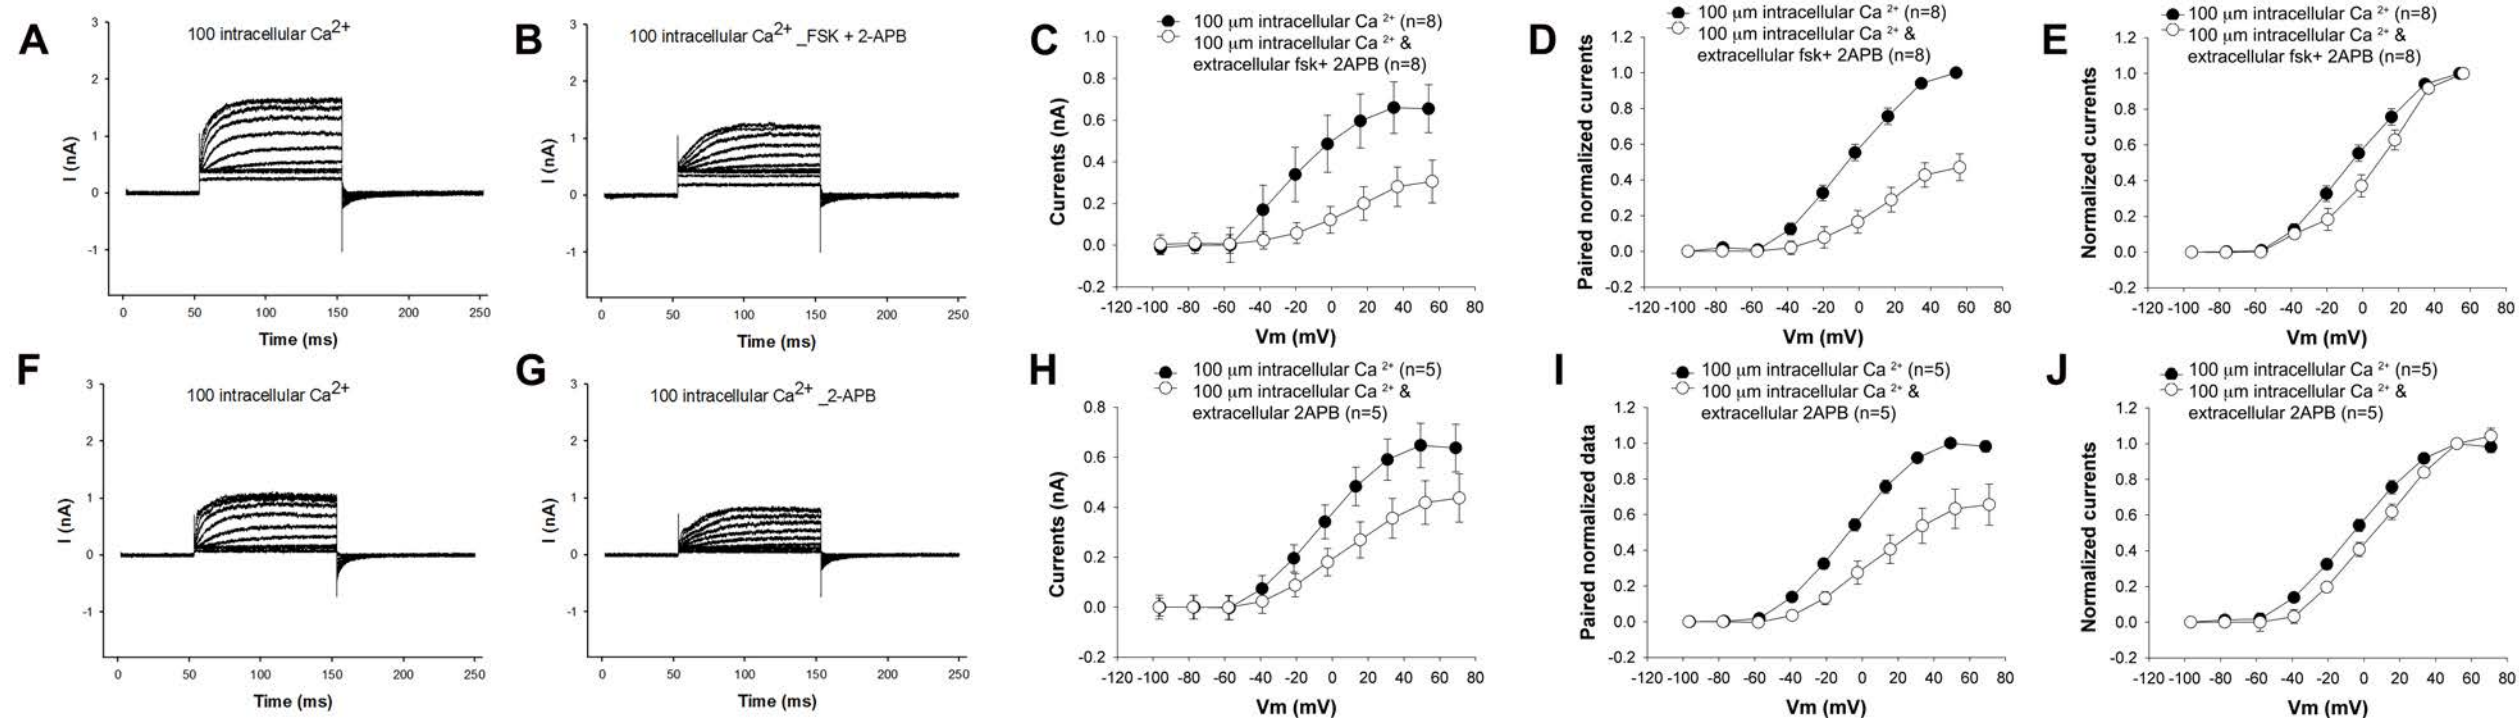

Figure 5

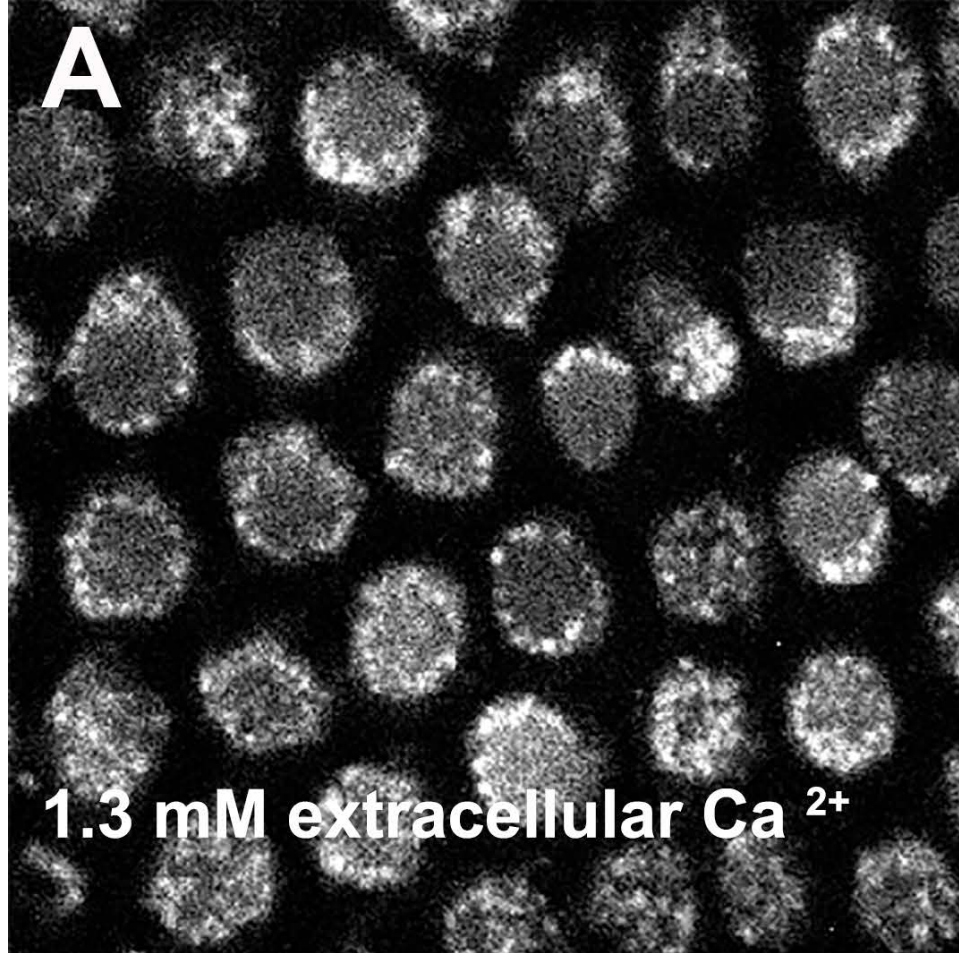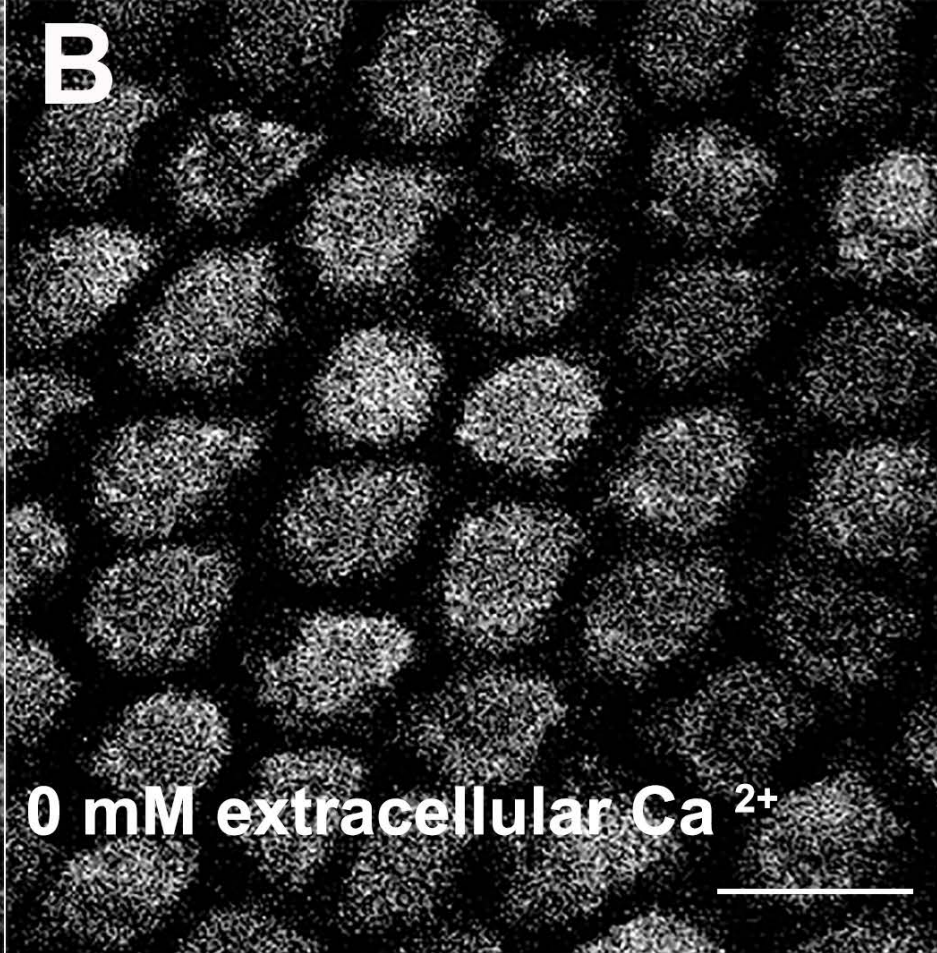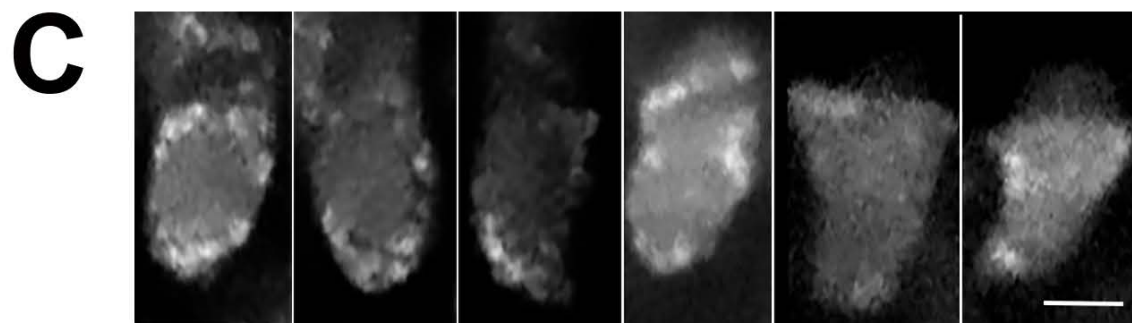

Figure 6

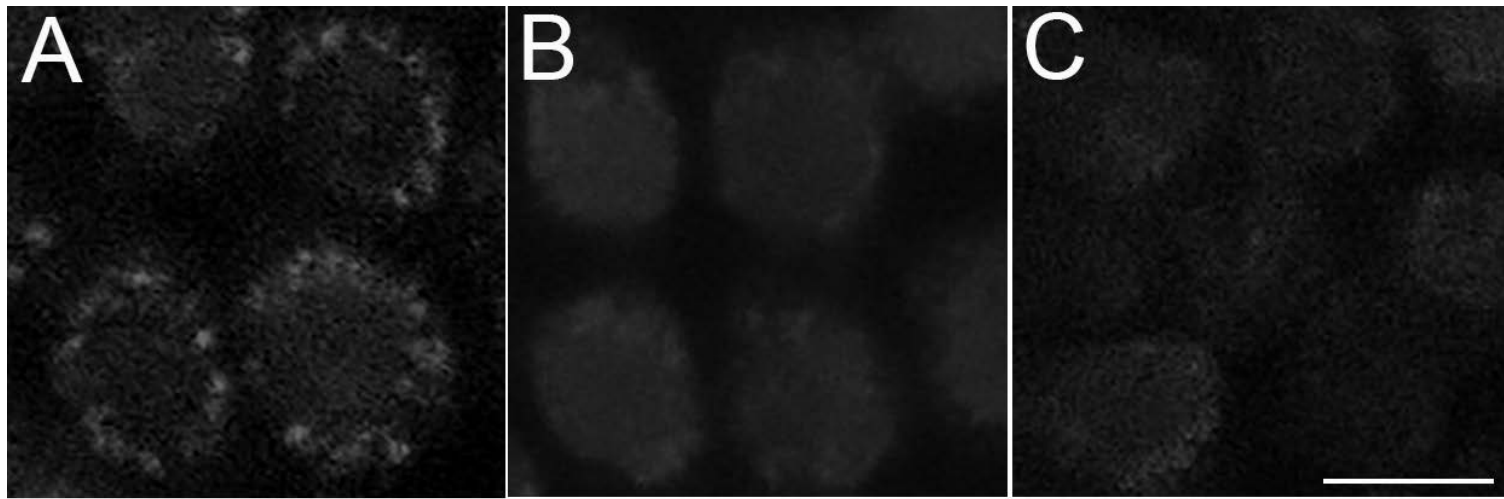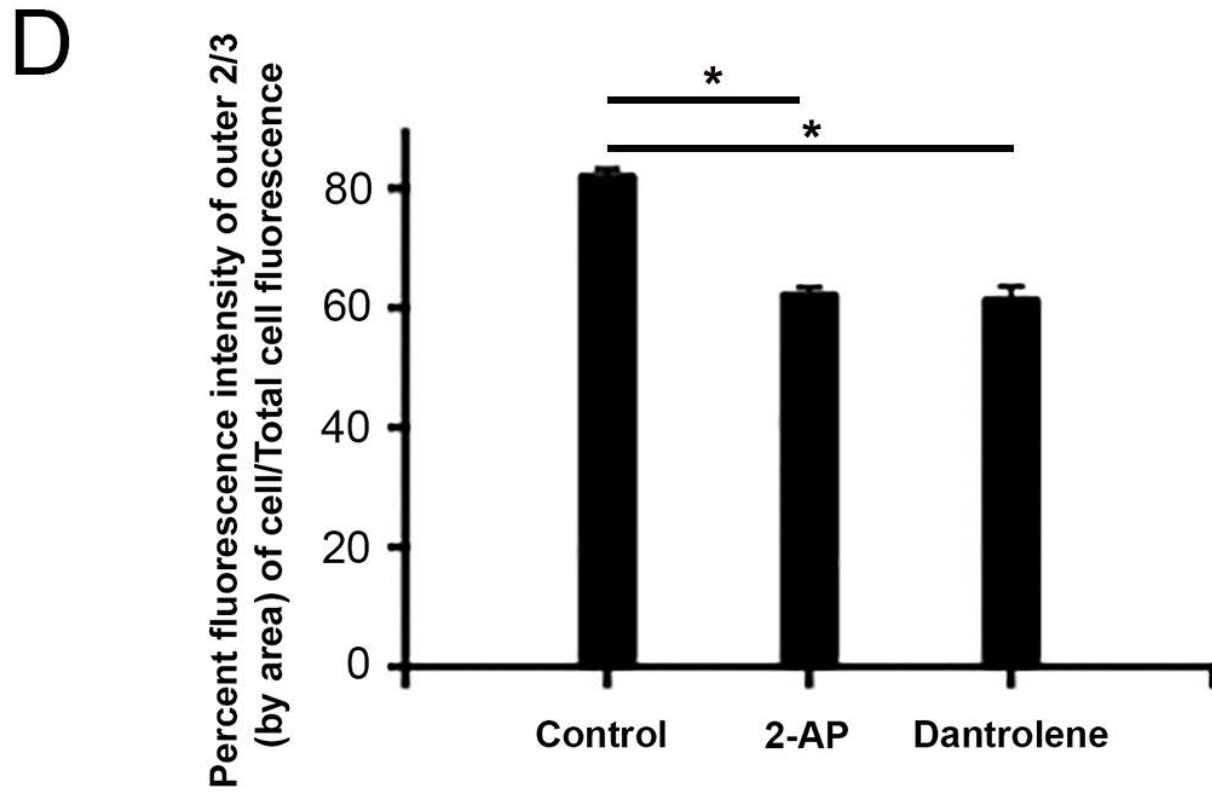

Figure 7



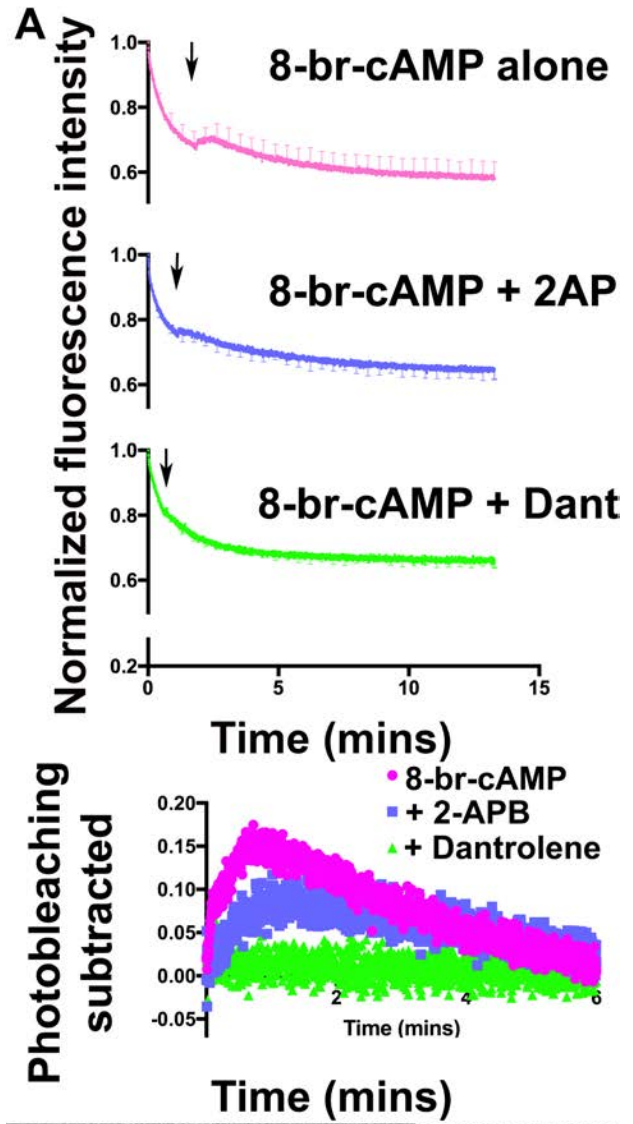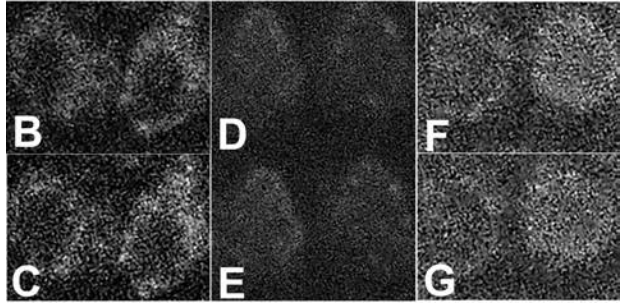

Figure 8

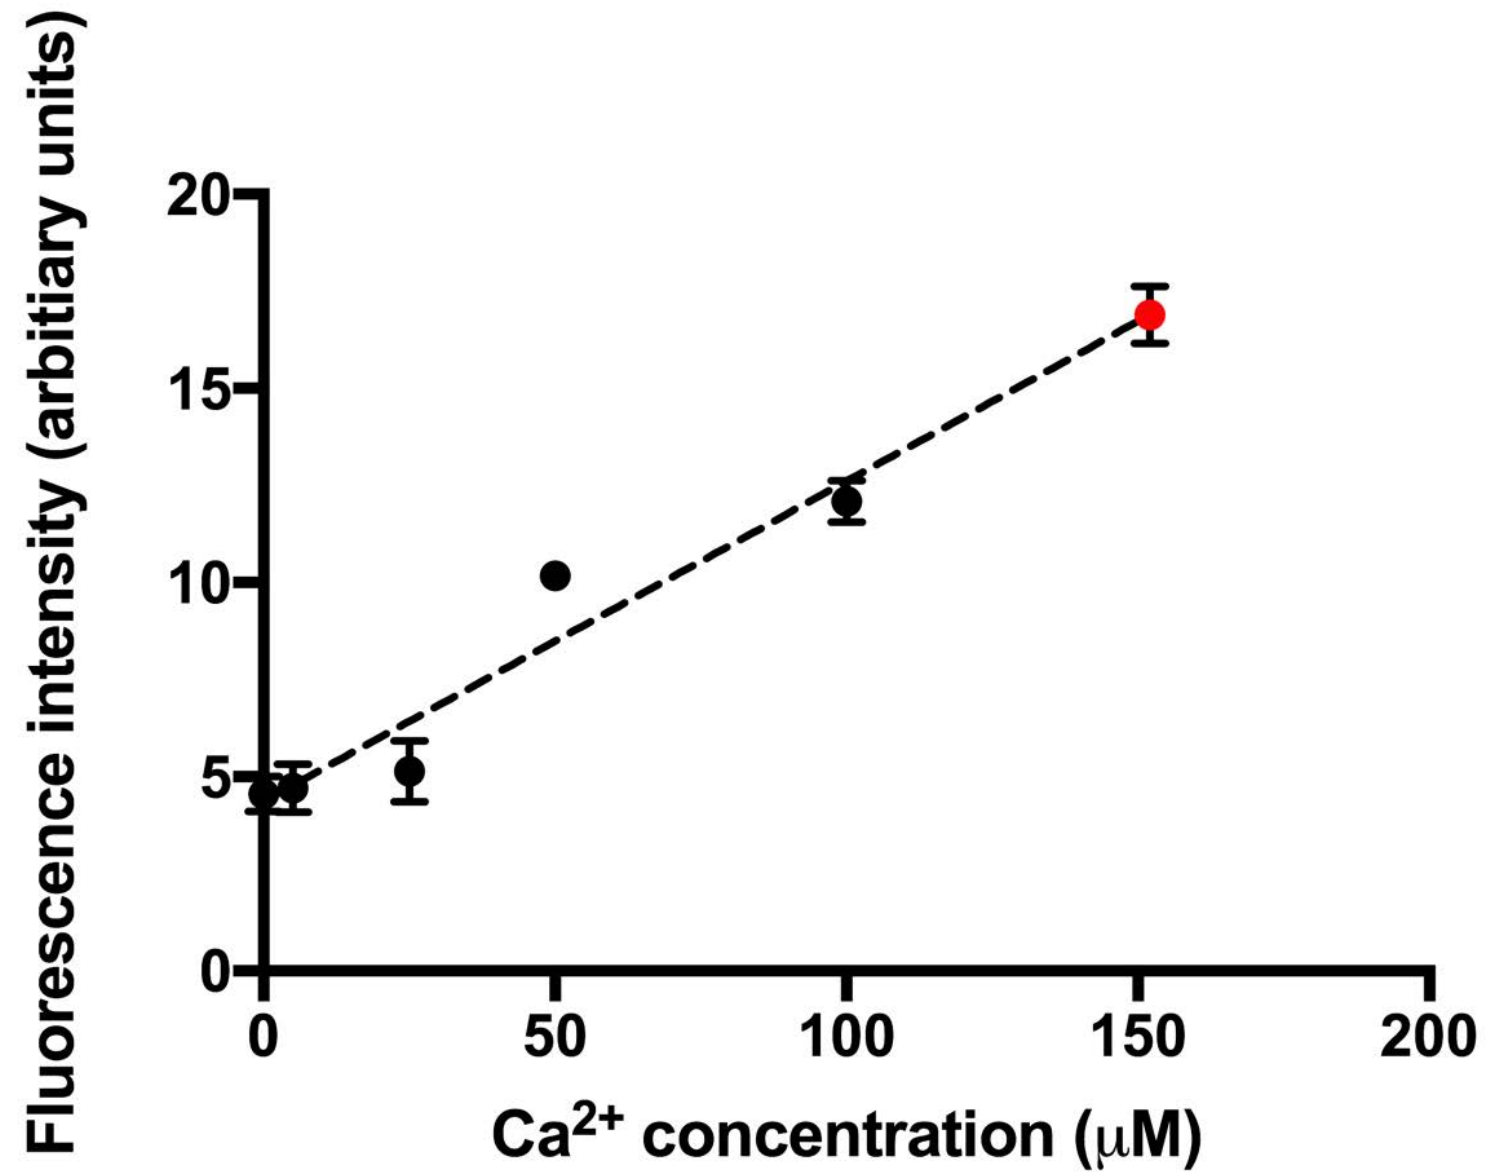

Figure 9

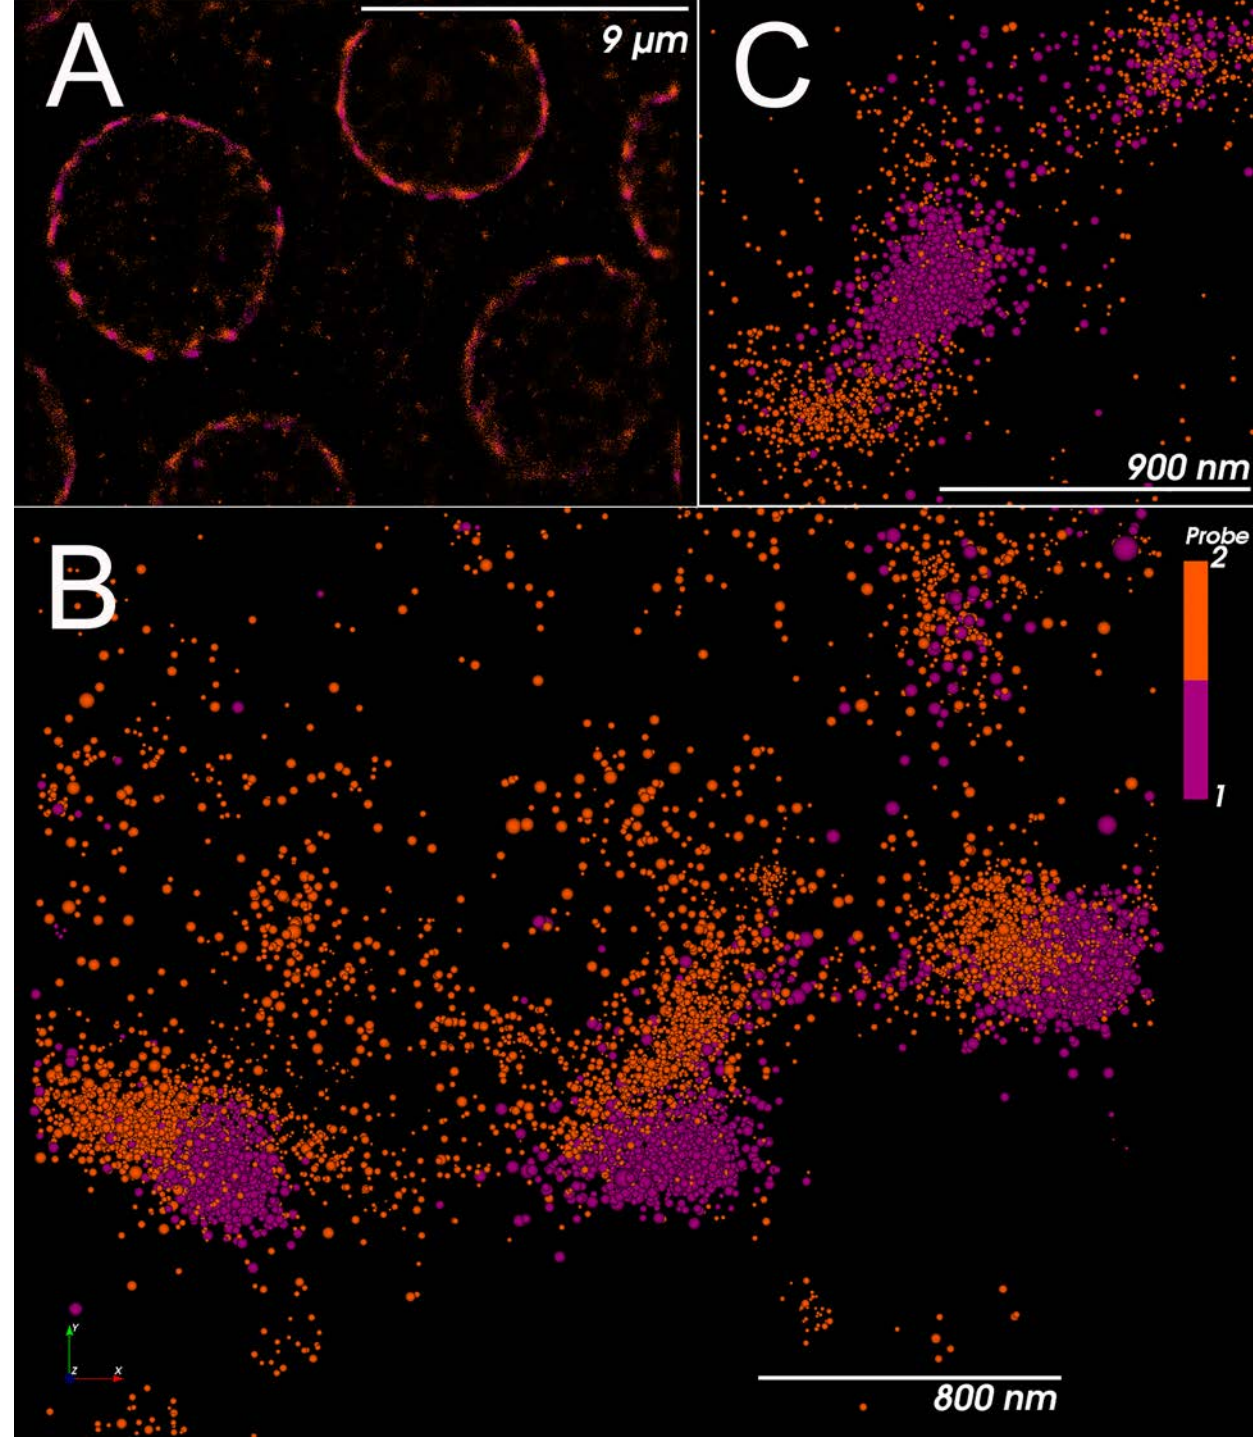

Figure 10

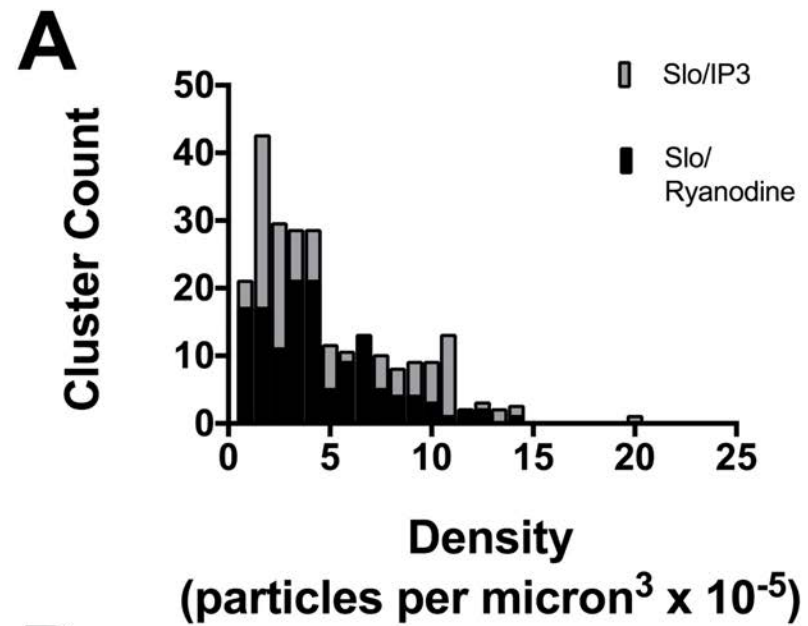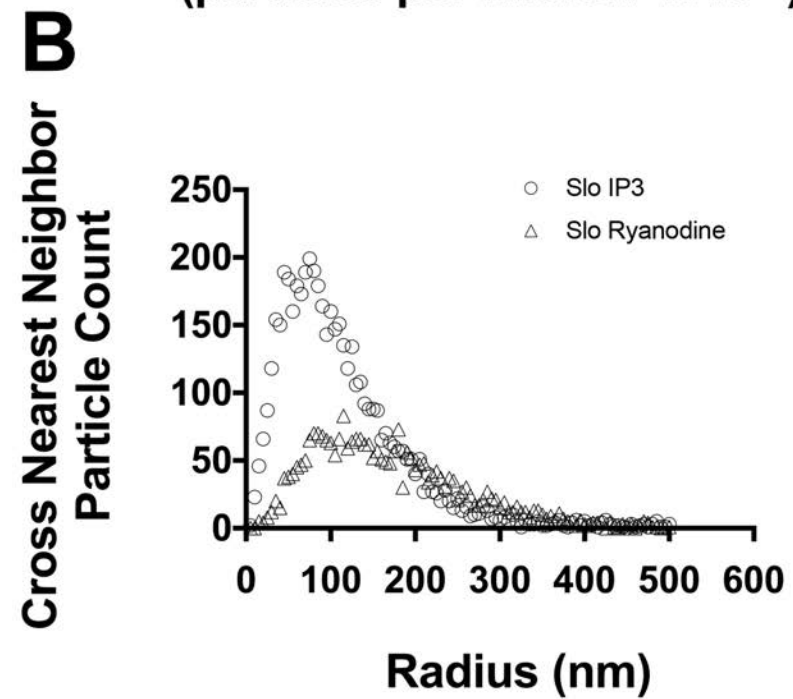

Figure 11
